# Supplementary material for: Primary vulvar squamous cell carcinomas with high T cell infiltration and active immune signaling are potential candidates for neoadjuvant PD-1/PD-L1 immunotherapy
Source: PubMed Central journal article supplement — J Immunother Cancer. 2021 Oct 29;9(10):e003671. doi: 10.1136/jitc-2021-003671 (PMC8559240; doi:10.1136/jitc-2021-003671), 2021-10-29
Supplement: jitc-2021-003671supp001.pdf [file jitc-2021-003671supp001.pdf]

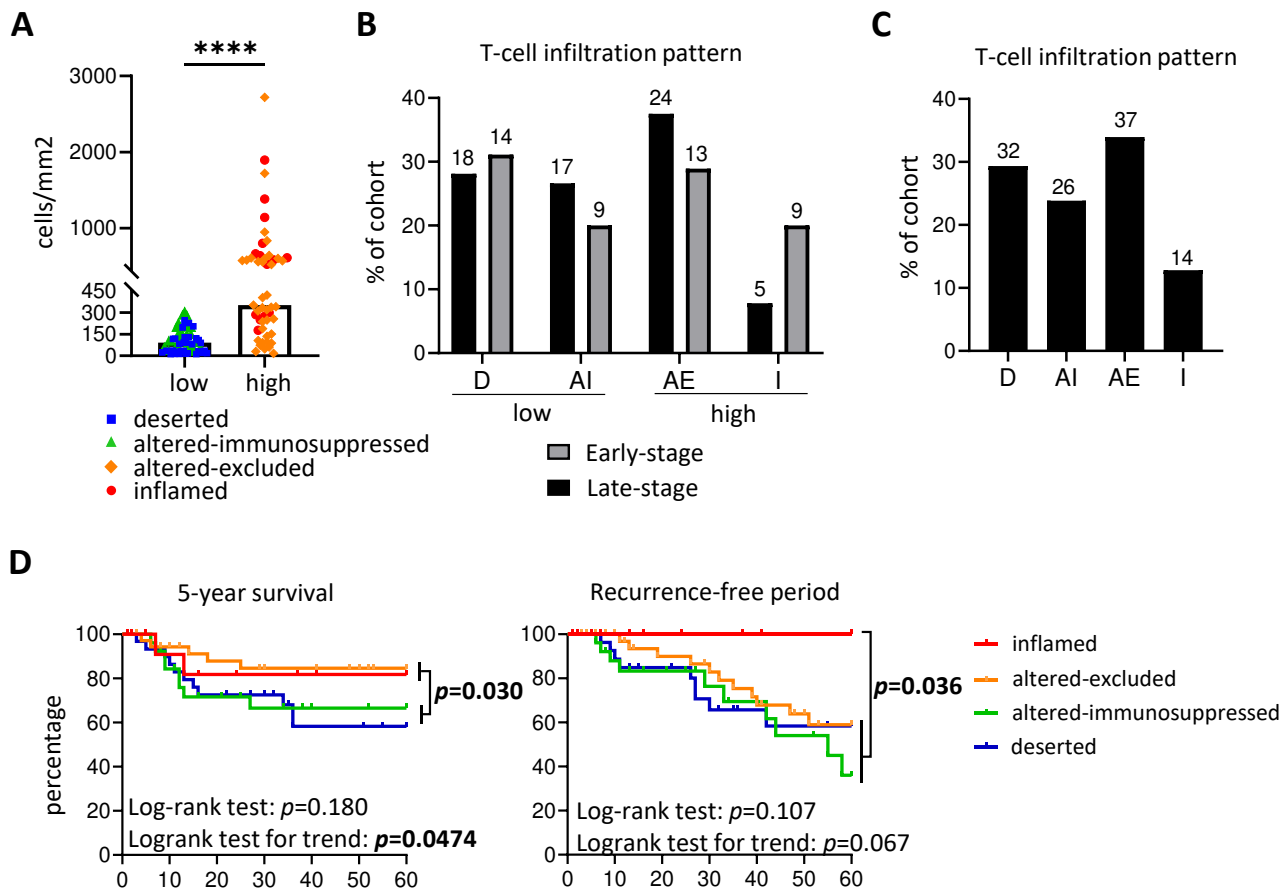

**Supplemental figure 1. Low and high infiltrated tumors were categorized based on their intraepithelial CD3<sup>+</sup> cell count.** Paraffin-embedded tumor tissue of VSCC patients was analyzed by multiplex immunofluorescent VECTRA analysis with antibodies directed against CD3, CD8, Foxp3, PD-1, pan-cytokeratin and DAPI as described in reference 9. **A**) Scatter plot displaying the number of intraepithelial CD3<sup>+</sup> T cell counts/mm<sup>2</sup> for patients with low infiltration (i.e. deserted (D; blue) and altered-immunosuppressed (AI, green)) or high infiltration (i.e. altered-excluded (AE, orange) and inflamed (I; red)) VSCC for the 109 FIGO I-III VSCC. **B, C**) Bar graphs displaying the observed T cell infiltration patterns for early-stage (black) and late-stage (grey) VSCC (**B**) and total cohort of VSCC (**C**). **D**) Kaplan-Meier curves showing 5-year survival (left) and the recurrence free period (RFP; right) for 109 FIGO I-III VSCC patients with inflamed (red; n=14), altered-excluded (orange; n=37), altered-immunosuppressed (green; n=26) and deserted (blue; n=32) T-cell infiltration patterns. Statistical significance of the survival distribution was analyzed by log-rank testing (Mantel-Cox and trend), and differences were considered significant when  $p < 0.05$ .

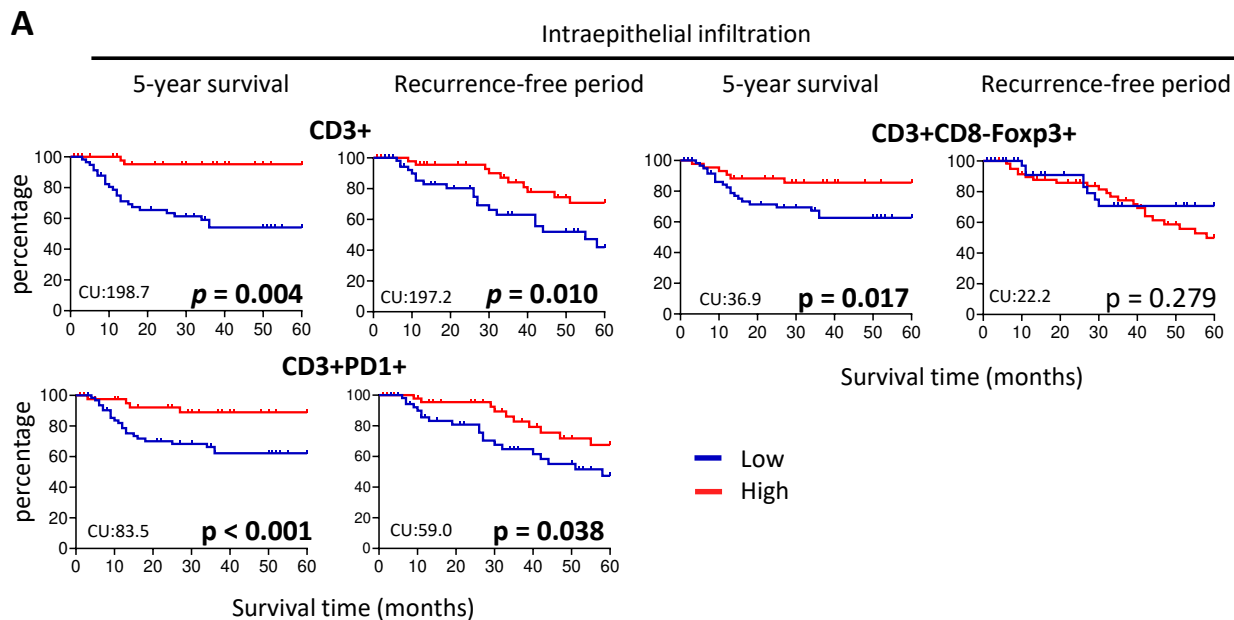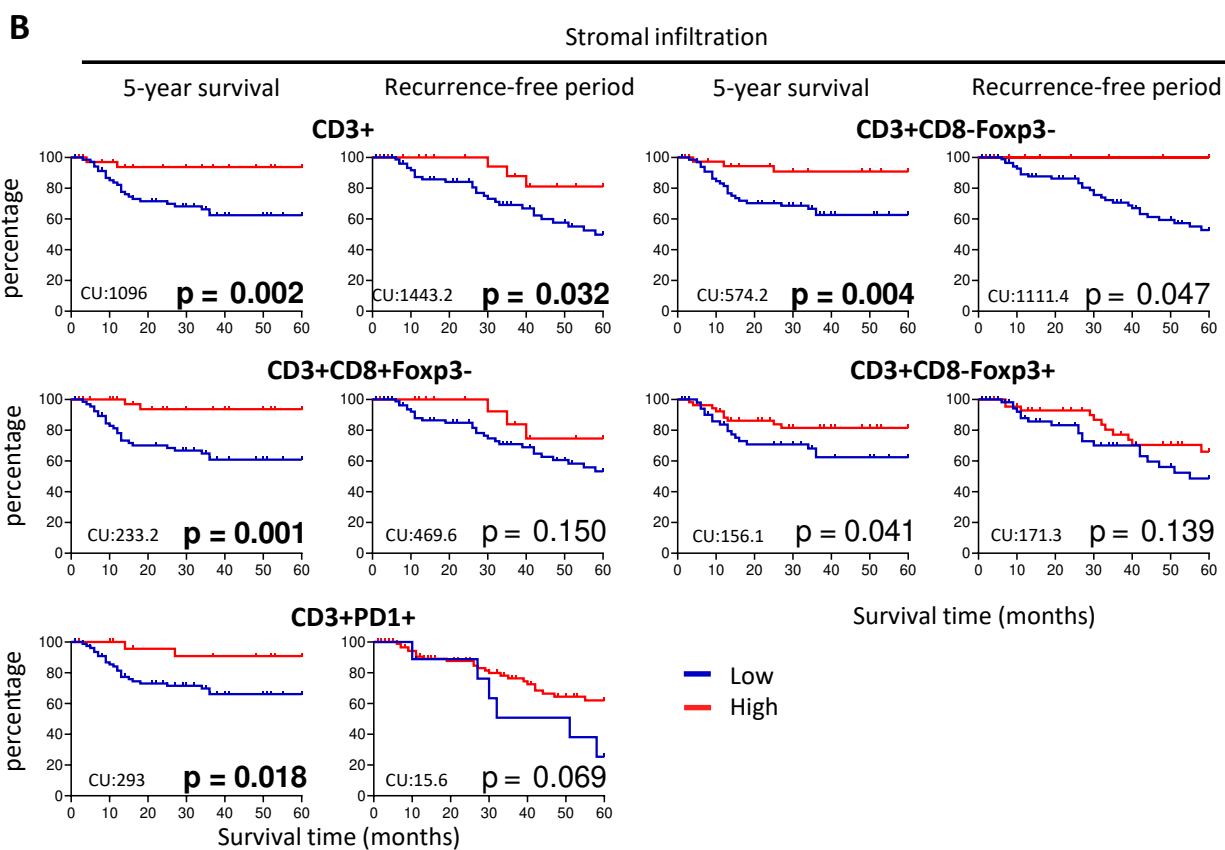

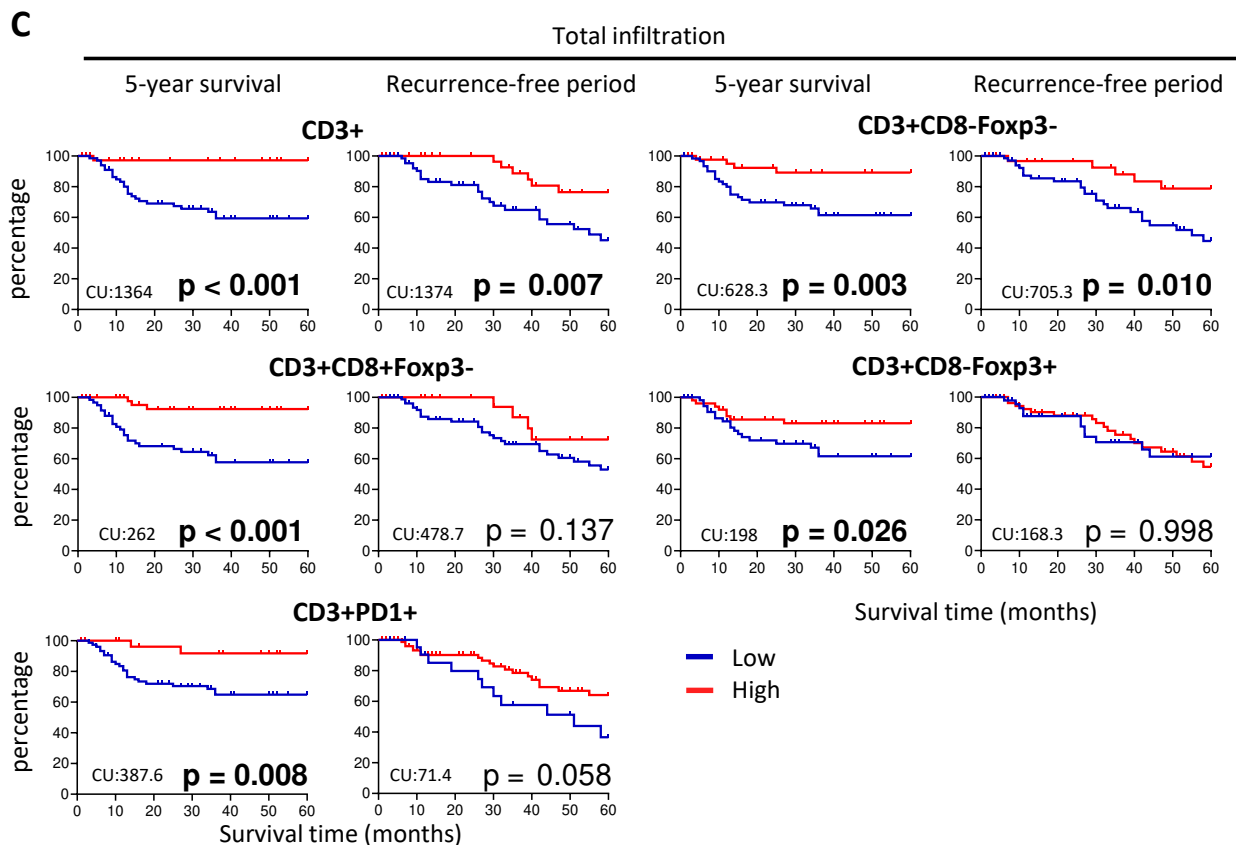

**Supplemental Figure 2. High immune infiltration is associated with better clinical outcome.** Kaplan-Meier curves showing the 5-years overall survival (first and third column) and recurrence-free period (second and fourth column) for early- and late-stage VSCC patients with low (blue) or high (red) numbers of **A**) intraepithelial CD3+, CD3+CD8-Foxp3+ and CD3+PD1+ cells/mm<sup>2</sup> and of stromal **B**) and total **C**) CD3+, CD3+CD8-Foxp3-, CD3+CD8-Foxp3+, CD3+CD8-Foxp3+, and CD3+PD1+ cells/mm<sup>2</sup>. Patients were grouped into the low or high groups based on the best cut-off value (CU) for each subset as determined by receiver operating characteristics (ROC) curve analysis. Patients with a T cell count below the cut-off value were classified as low, and visa versa. CU values are given in the low left corner of each Kaplan-Meier curve. Statistical significance of the survival distribution was analyzed by log-rank testing. Significant differences  $p < 0.05$  were shown in bold.

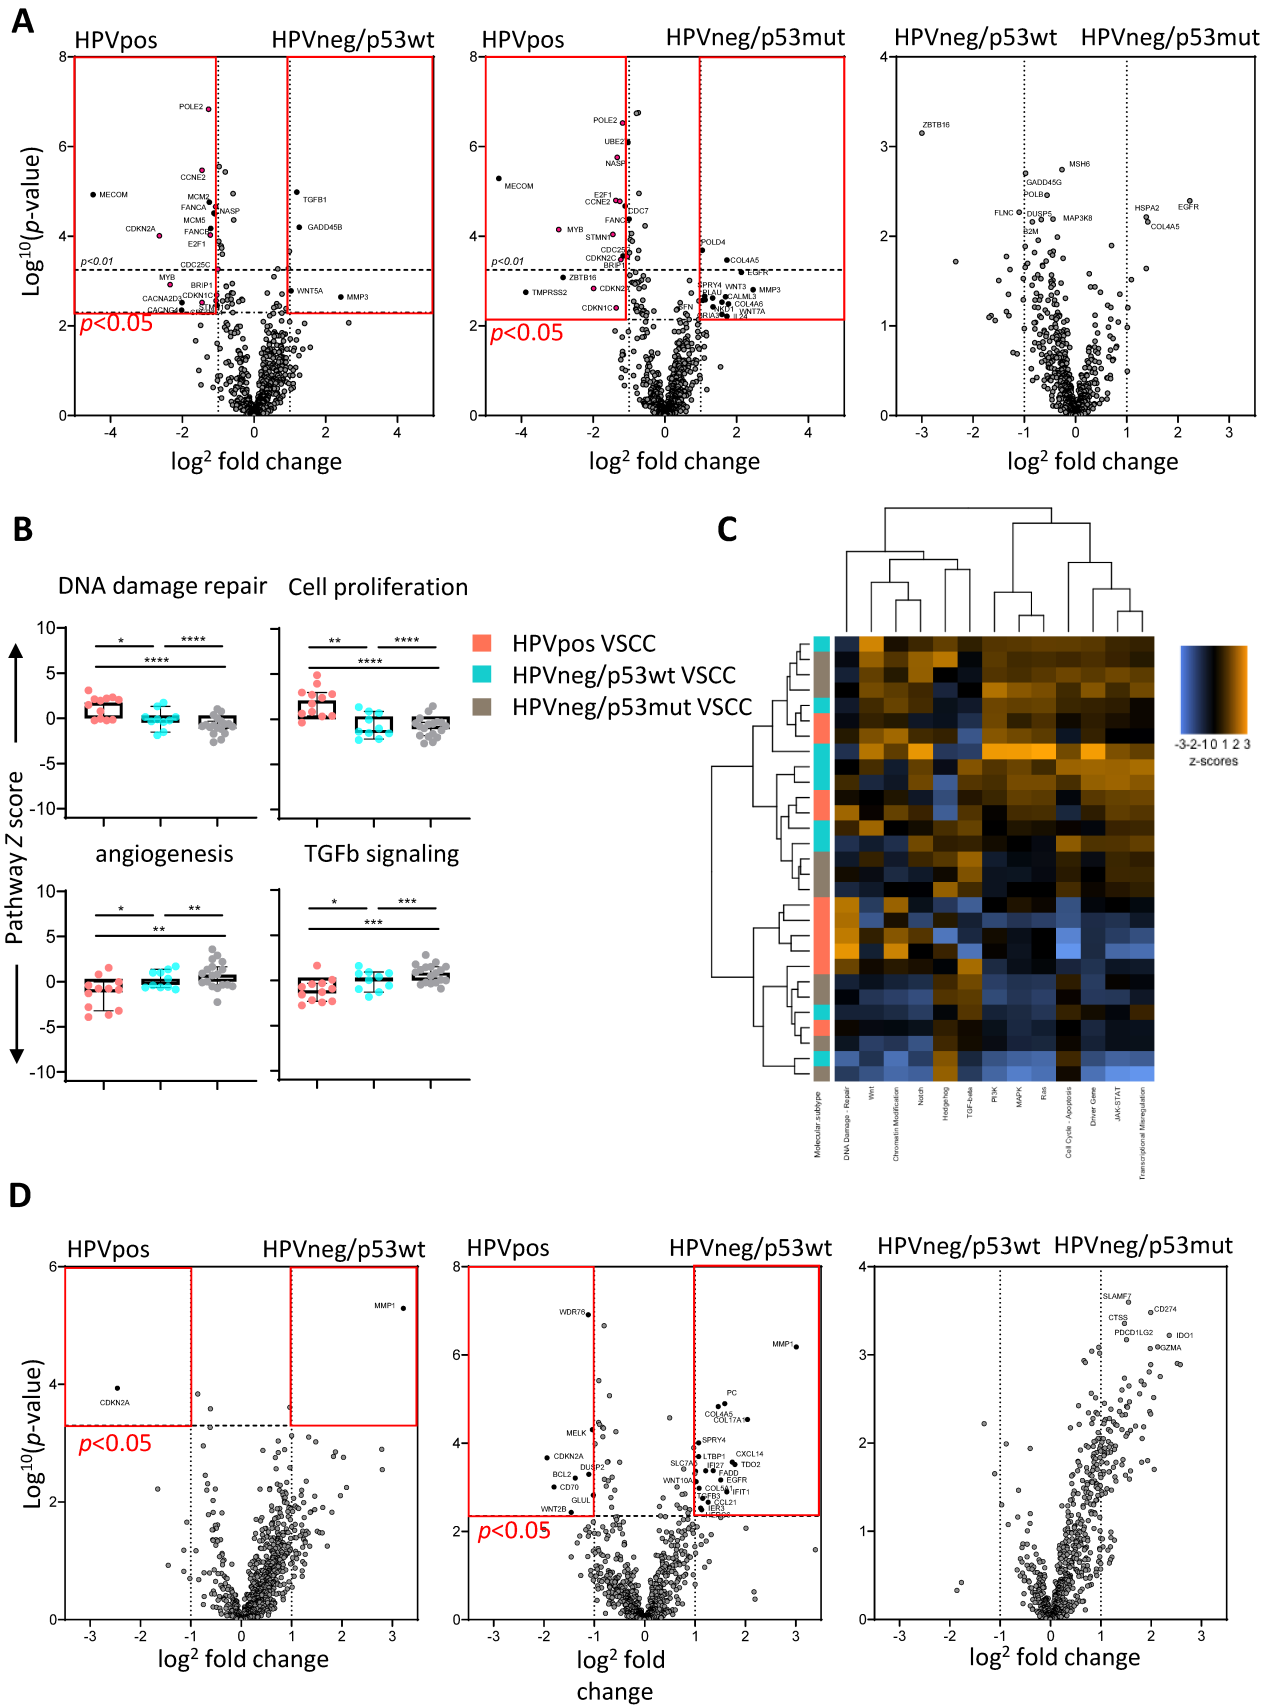

**Supplemental figure 3. Minor differences observed between molecular subtypes of VSCC.** Early-stage (n=29) and late-stage (n=11) VSCC of all three molecular subtypes (HPVpos (n=12), HPVneg/p53wt (n=10), and HPVneg/p53mut (n=18) VSCC) were analyzed by the PanCancer oncogenic pathway (early-stage only) and PanCancer IO360 (early- and late-stage) panels. The data were analyzed using nCounter Advanced Analysis module 2.0 software. **A)** Volcano plots depicting the differentially expressed genes (DEGs) between HPVpos and HPVneg/p53wt (left), HPVpos and HPVneg/p53mut (middle) and HPVneg/p53wt and HPVneg/p53mut (right) early-stage VSCC based on a  $\log^2$  fold change of  $>1$  or  $<-1$  in combination with Benjamini-Hochberg (BH) adjusted  $p < 0.05$ . Significant (BH p-values) genes are indicated by the red lines. Overlapping DEGs that are up in HPVpos vs HPVneg/p53wt or HPVneg/p53mt are indicated in pink. **B)** Box plots showing the differences in the cancer-associated canonical signaling pathways Z scores for HPVpos (red), HPVneg/p53wt (blue) and HPVneg/p53mut (grey) VSCC. **C)** Heatmap plot displaying pathway scores of 13 cancer-associated canonical signaling pathways within the PanCancer Pathway panel. Pathway scores were calculated and displayed as Z-transformed values where orange represents high scores, and blue represents low scores. **D)** Volcano plots depicting the differentially expressed genes (DEGs) between HPVpos and HPVneg/p53wt (left), HPVpos and HPVneg/p53mut (middle) and HPVneg/p53wt and HPVneg/p53mut (right) early-stage and late-stage VSCC based on a  $\log^2$  fold change of  $>1$  or  $<-1$  in combination with Benjamini-Hochberg (BH) adjusted  $p < 0.05$ . Significant (BH p-values) genes are indicated by the red lines. \* $p < 0.05$ , \*\* $p < 0.01$ , \*\*\* $p < 0.001$ , and \*\*\*\* $p < 0.0001$ .

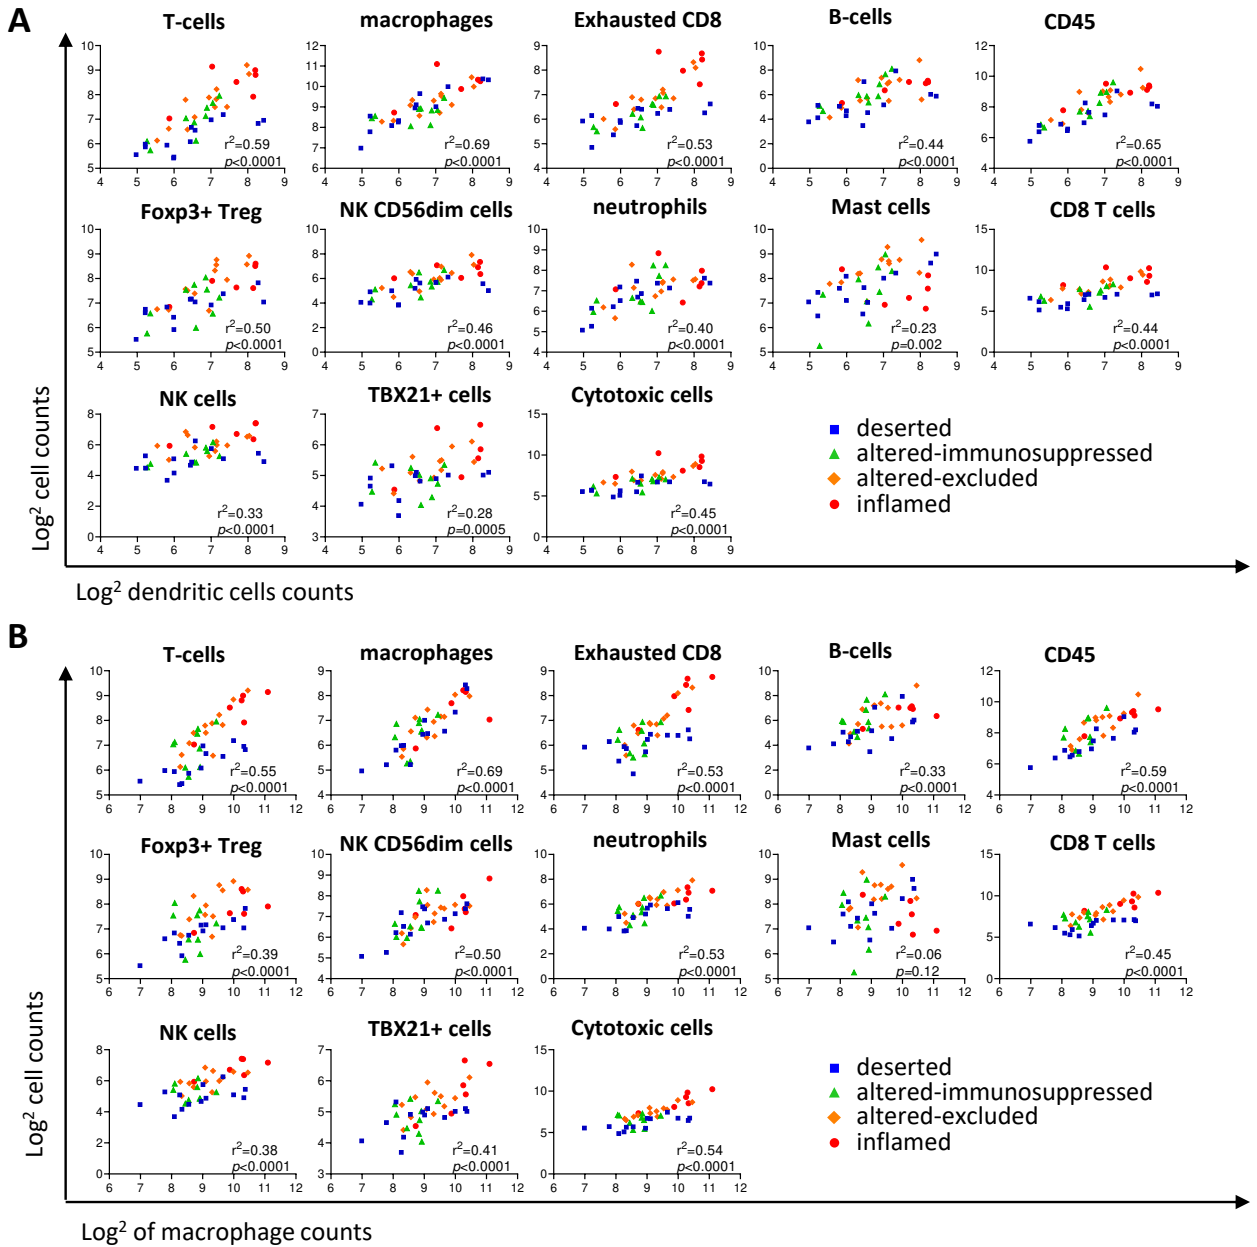

**Supplemental figure 4. A coordinated immune response between immune cell types.** Automated cell type profiling was performed by using nCounter Advanced Analysis module 2.0 software and was based on the expression of pre-defined genes (Supplemental Table 4). Linear regression analyses of indicated deconvoluted cell types (Y-axis) versus **A**) dendritic cells (DCs, X-axis) and **B**) macrophages (X-axis). Data is given as log<sub>2</sub> transformed cell counts. The different T-cell infiltration patterns are depicted in color code. \* $p < 0.05$ , \*\* $p < 0.01$ , \*\*\* $p < 0.001$ , and \*\*\*\* $p < 0.0001$ .

## Upregulated in cold

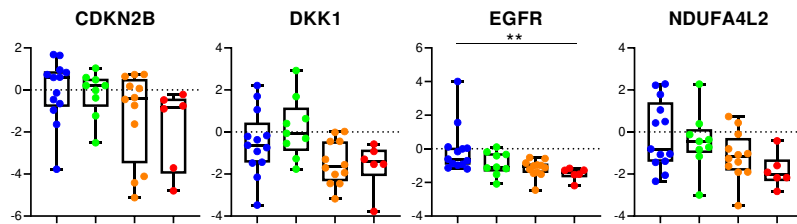

## Lymphoid compartment

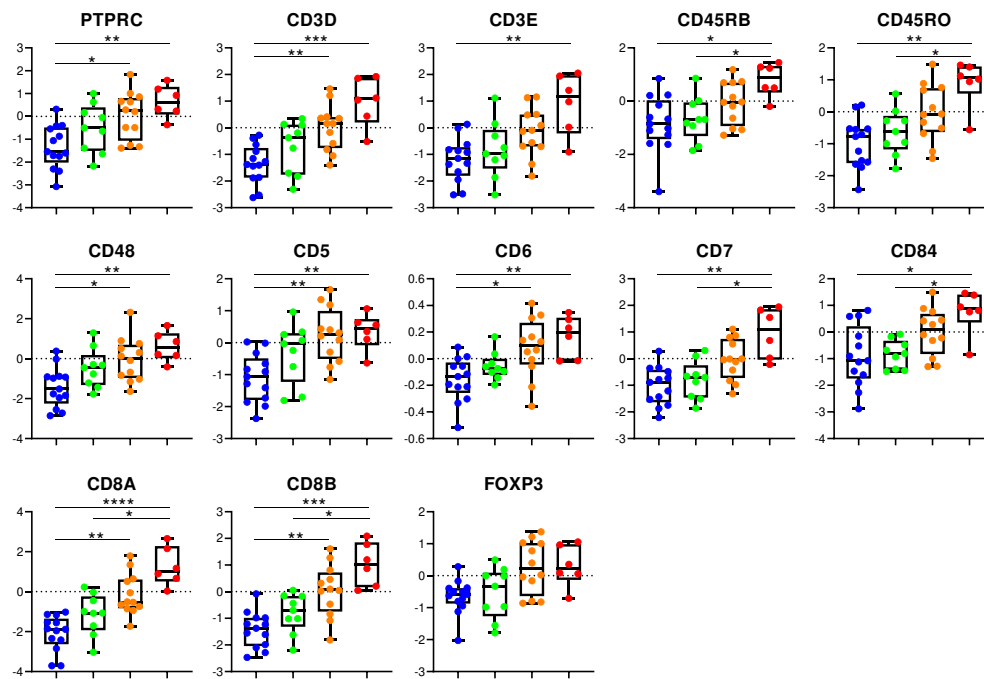

## Myeloid compartment

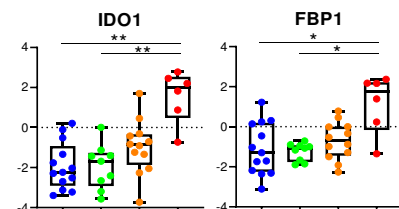

## cytotoxicity

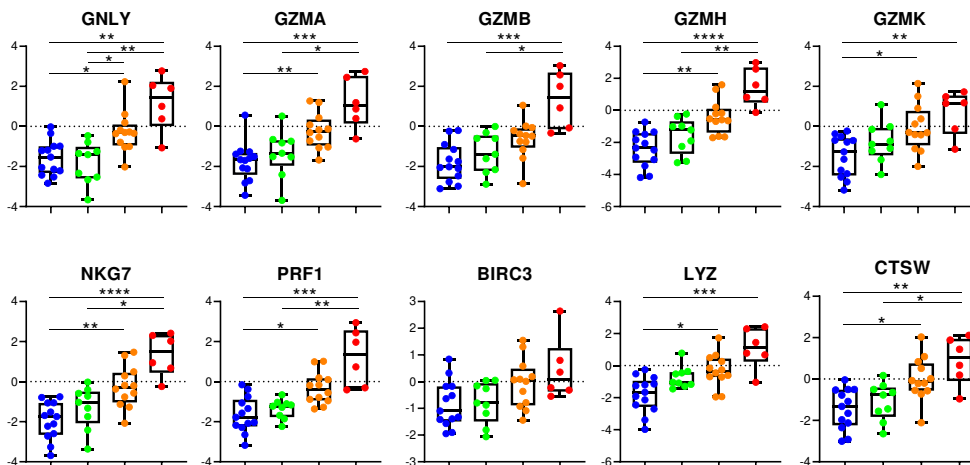

Supplemental figure 5

Adhesion and migration

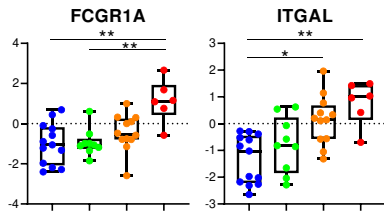

Cytokine and chemokine signaling

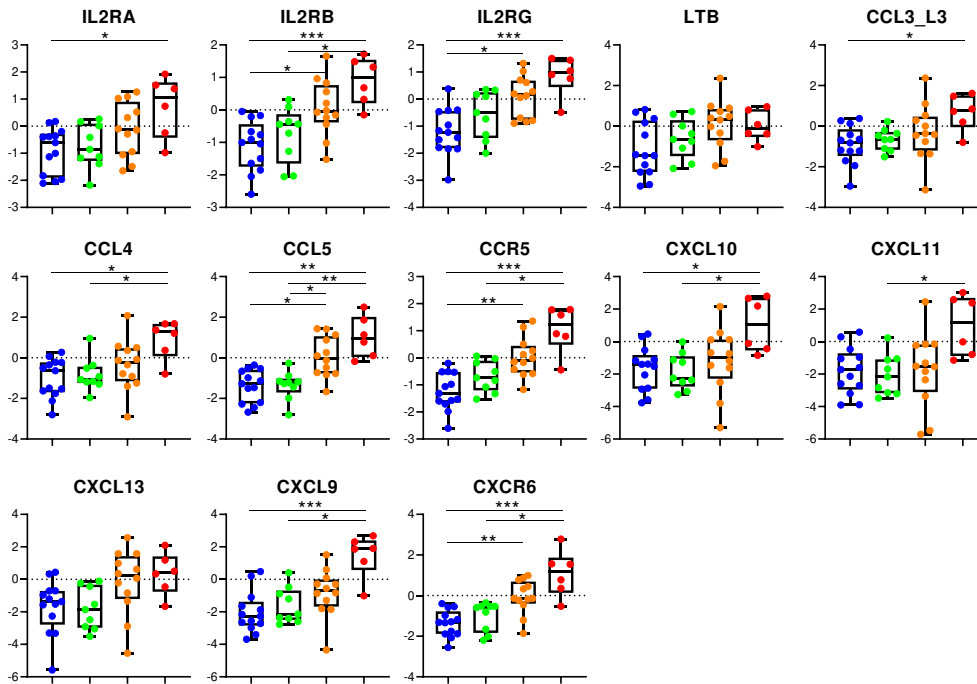

T cell signaling

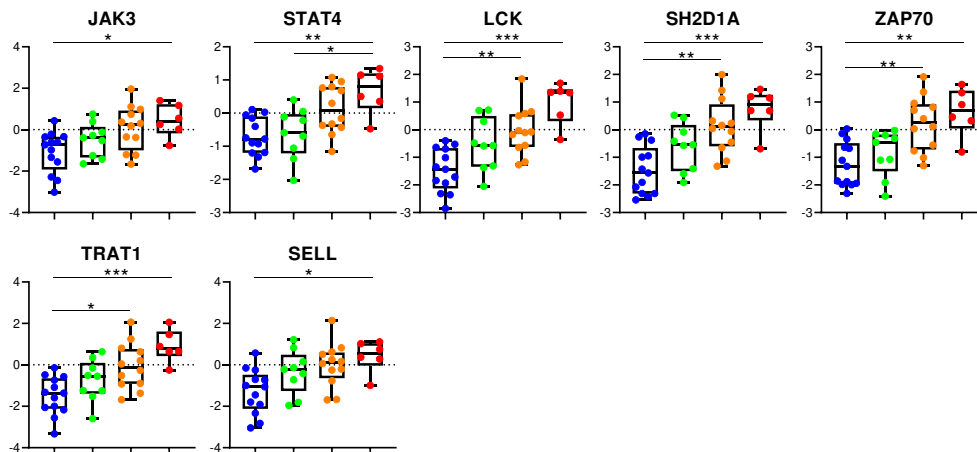



Checkpoint molecules

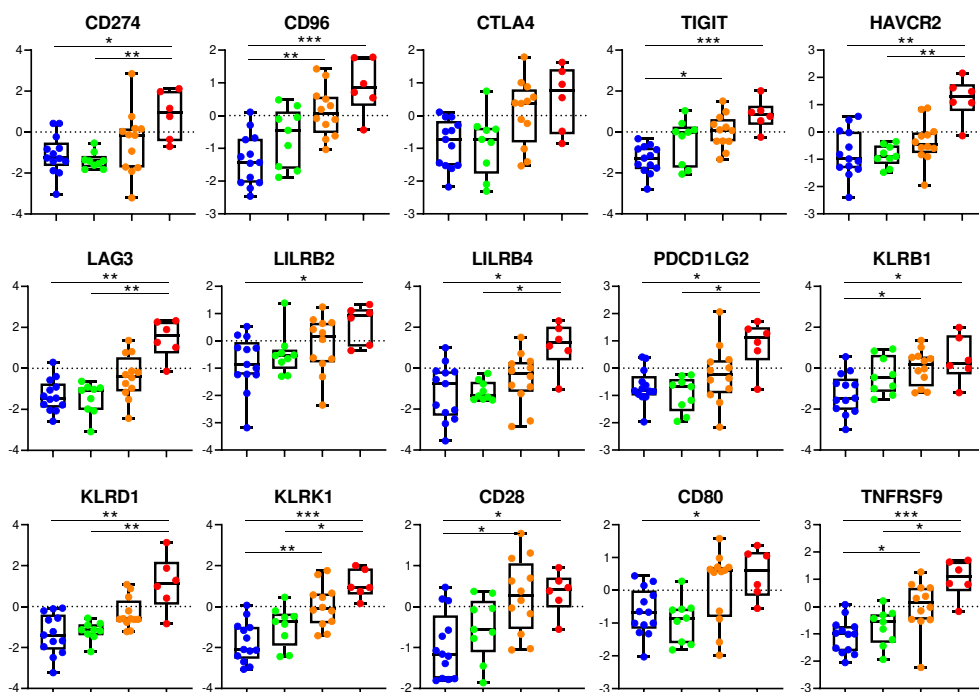

Antigen presentation

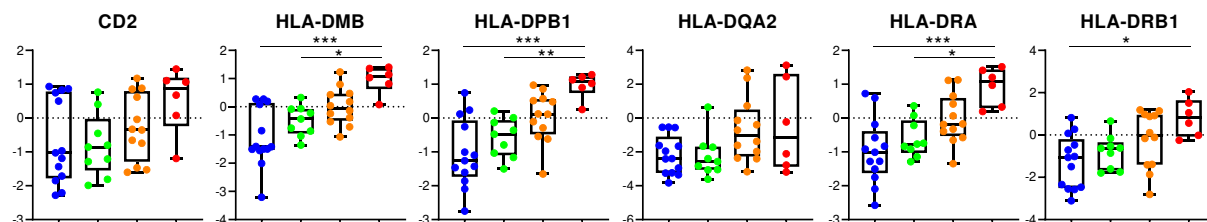

IFN signaling

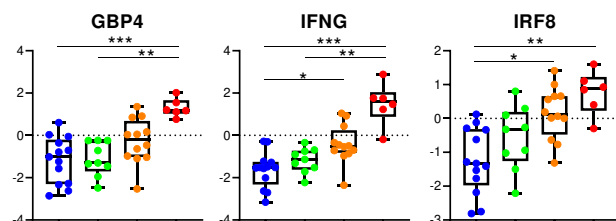

miscellaneous

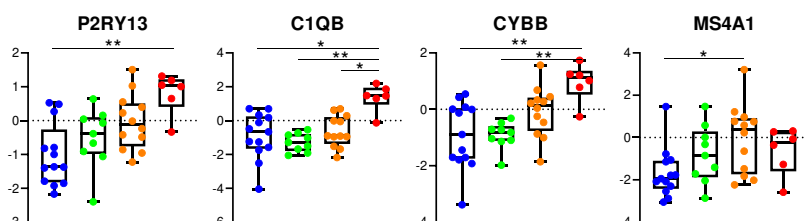

**Supplemental figure 5. All differentially expressed single genes that were different between high and low infiltrated tumors were depicted in respect to their T cell infiltration pattern.** Box plots displaying all significant differentially expressed genes (corrected  $p$ -value  $<0.05$  and  $\log^2$  fold change  $>1$  or  $<-1$ ) between high and low infiltrated tumors. Expression of the selected single genes in the heatmap were given as  $\log^2$  transformed values relative to the average value of that particular gene. VSCC patients are categorized based on the T-cell pattern: deserted (blue), altered-immunosuppressed (green), altered-excluded (orange) and inflamed (red). \* $p<0.05$ , \*\* $p<0.01$ , \*\*\* $p<0.001$ , and \*\*\*\* $p<0.0001$ .

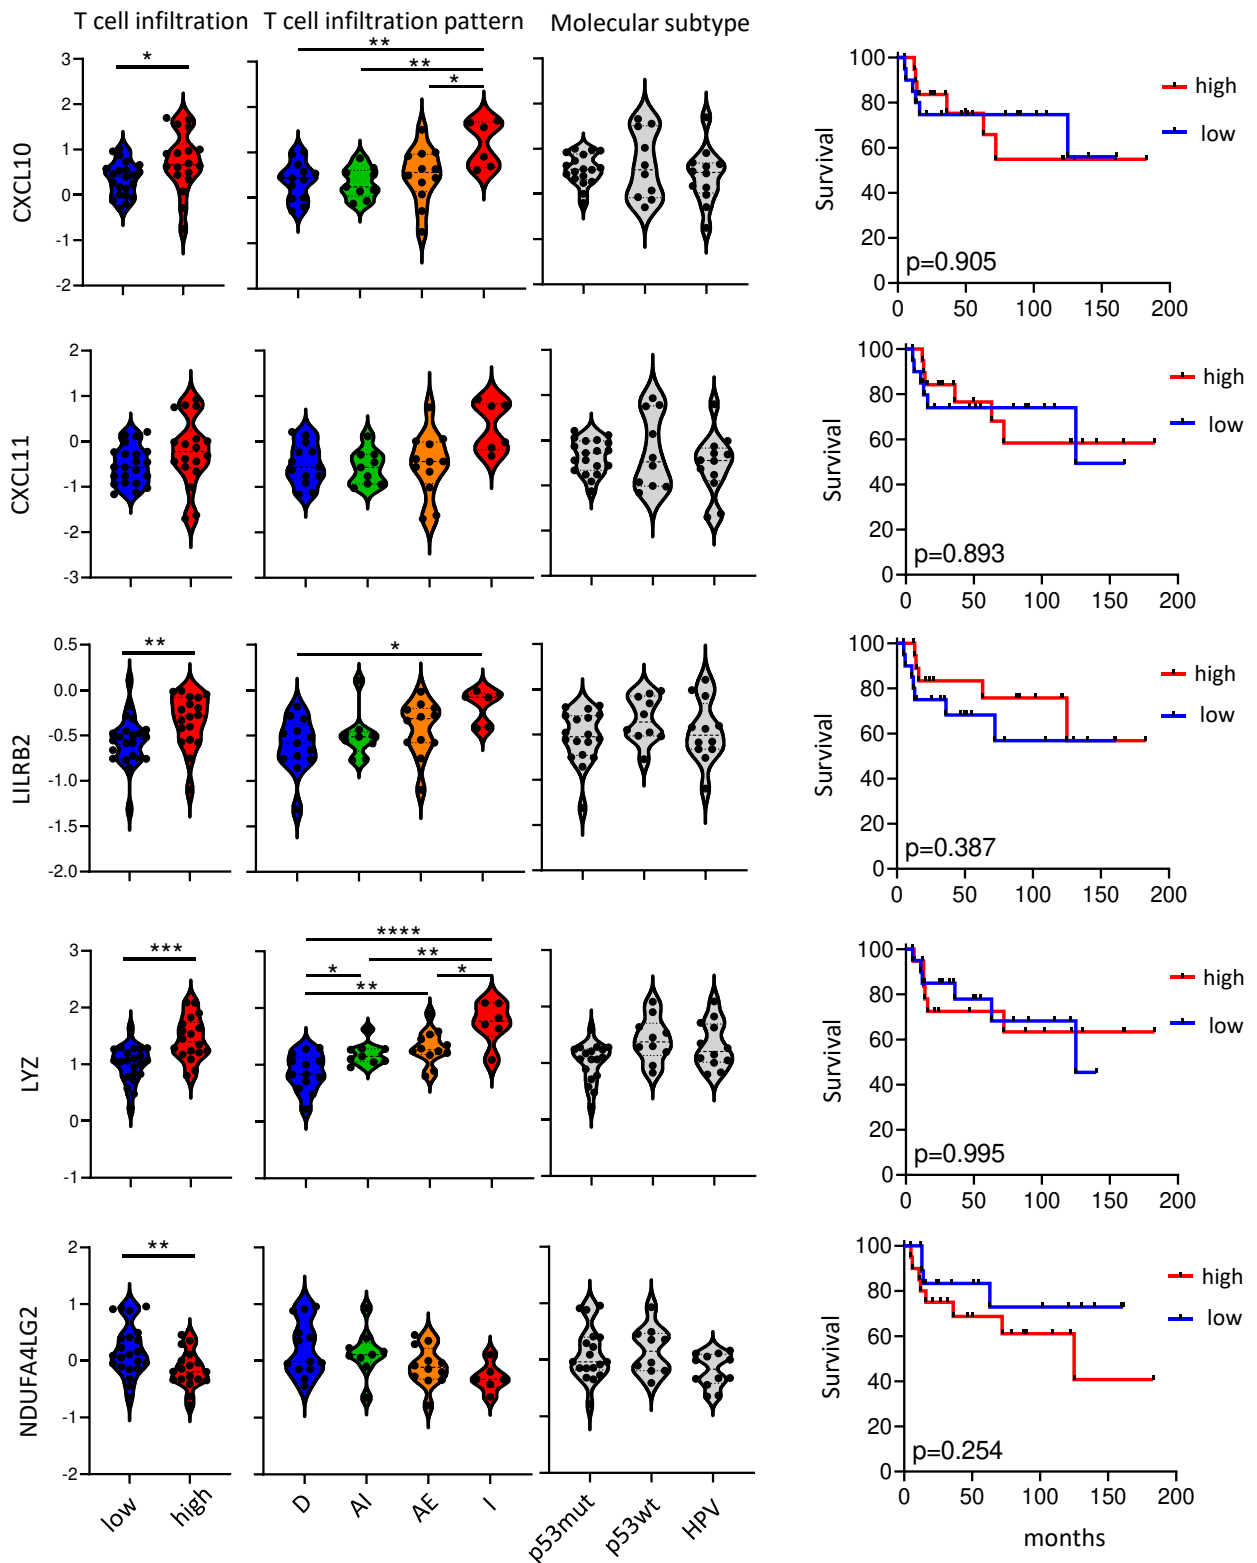

**Supplemental figure 6. High infiltrated tumors are associated with a higher VSCC-inflamed gene expression profile (GEP) score.** Forty VSCC samples of all three molecular subtypes (HPVpos, HPVneg/p53wt and HPVneg/p53mut VSCC) were analyzed by the Nanostring IO360 Pancancer panel, and log<sub>10</sub> transformed expression values for *CXCL10*, *CXCL11*, *LILRB2*, *LYZ* and *NDUFA4LG2* were determined. Graphs depict violin plots and Kaplan-Meier survival curves for the individual genes. Violin plots display the log<sub>10</sub>-transformed expression values for T cell infiltration (low versus high tumors), T cell infiltration pattern (deserted (D), altered-immunosuppressed (AI), altered-excluded (AE) and Inflamed (I) VSCC) and tumor molecular subtype (HPVneg/p53mut, HPVneg/p53wt and HPVpos VSCC). Kaplan-Meier survival curves showing the survival of 40 VSCC patients with high (red; above the median) and low (blue; below the median) expression of the indicated genes. \* $p < 0.05$ , \*\* $p < 0.01$ , \*\*\* $p < 0.001$ , and \*\*\*\* $p < 0.0001$ .
