# Supplementary material for: Primary vulvar squamous cell carcinomas with high T cell infiltration and active immune signaling are potential candidates for neoadjuvant PD-1/PD-L1 immunotherapy
Source: PubMed Central journal article supplement — J Immunother Cancer. 2021 Oct 29;9(10):e003671. doi: 10.1136/jitc-2021-003671 (PMC8559240; doi:10.1136/jitc-2021-003671), 2021-10-29
Supplement: jitc-2021-003671supp002.pdf [file jitc-2021-003671supp002.pdf]

**Supplemental Table 1. Patient demographics**

| Characteristic, n (%)                | Late stage VSCC (n=45)        | Early stage VSCC (n=64)        | p-value        |
|--------------------------------------|-------------------------------|--------------------------------|----------------|
| Age (years) - median (range)         | 67 (42-98)                    | 69 (40-91)                     | 0.682          |
| Smoking                              |                               |                                | 0.876          |
| No                                   | 22 (48.9%)                    | 30 (46.9%)                     |                |
| Current                              | 12 (26.7%)                    | 21 (32.8%)                     |                |
| Stopped                              | 4 (8.9%)                      | 4 (6.2%)                       |                |
| Unknown                              | 7 (15.5%)                     | 9 (14.1%)                      |                |
| Immunosuppression                    |                               |                                | 0.347          |
| HIV                                  | -                             |                                |                |
| Immunosuppressive medication         | -                             | 2 (3.1%)                       |                |
| HPV/p53 status                       |                               |                                | <0.001         |
| HPV positive                         | 6 (13.3%)                     | 23 (35.9%)                     |                |
| HPV negative, p53 wild type          | 7 (15.6%)                     | 20 (31.3%)                     |                |
| HPV negative, p53 mutant             | 32 (71.1%)                    | 21 (32.8%)                     |                |
| FIGO stadium                         |                               |                                | <0.001         |
| IA                                   | -                             | 3 (4.7%)                       |                |
| IB                                   | -                             | 61 (95.3%)                     |                |
| II                                   | -                             | -                              |                |
| IIIA                                 | 39 (86.7%)                    | -                              |                |
| IIIB                                 | 6 (13.3%)                     | -                              |                |
| Tumor size in cm                     |                               |                                | 0.144          |
| ≤ 2cm                                | 15 (33.3%)                    | 34 (53.1%)                     |                |
| 2-4 cm                               | 17 (37.8%)                    | 18 (28.1%)                     |                |
| ≥ 4 cm                               | 13 (28.9%)                    | 11 (17.2%)                     |                |
| Unknown                              |                               | 1 (1.6%)                       |                |
| Invasion depth in mm                 |                               |                                | 0.015          |
| ≤4mm                                 | 13 (28.9%)                    | 33 (51.6%)                     |                |
| >4mm                                 | 31 (68.9%)                    | 29 (45.3%)                     |                |
| Unknown                              | 1 (2.2%)                      | 2 (3.1%)                       |                |
| Lymphovascular space invasion        |                               |                                | 0.149          |
| No                                   | 35 (77.8%)                    | 57 (89.0%)                     |                |
| Yes                                  | 7 (15.5%)                     | 3 (4.7%)                       |                |
| Unknown                              | 3 (6.7%)                      | 4 (6.3%)                       |                |
| Perineural growth                    |                               |                                | 0.010          |
| No                                   | 17 (37.8%)                    | 31 (48.4%)                     |                |
| Yes                                  | 8 (17.8%)                     | 1 (1.6%)                       |                |
| Unknown                              | 20 (44.4%)                    | 32 (50.0%)                     |                |
| Primary treatment modality           |                               |                                | <0.001         |
| Surgery                              | 21 (46.7%)                    | 62 (96.8%)                     |                |
| Surgery & (chemo)radiotherapy        | 24 (53.3%)                    | 1 (1.6%)                       |                |
| Unknown                              | -                             | 1 (1.6%)                       |                |
| Recurrence (60 months)               |                               |                                | 0.412          |
| No                                   | 35 (77.8%)                    | 44 (68.7%)                     |                |
| Yes                                  | 10 (22.2%)                    | 20 (31.3%)                     |                |
| Overall survival (60 months)         |                               |                                | 0.004          |
| Alive                                | 27 (60.0%)                    | 55 (85.9%)                     |                |
| Dead                                 | 18 (40.0%)                    | 9 (14.1%)                      |                |
|                                      |                               |                                |                |
| <b>Follow-up (median, IQR range)</b> | <b>Late stage VSCC (n=45)</b> | <b>Early stage VSCC (n=64)</b> | <b>p-value</b> |
| Follow-up time, months               | 76.0 (7-134)                  | 40.5 (1-201)                   | 0.073          |
| Time to recurrence, months           | 26.0 (6-84)                   | 32.5 (7-125)                   | 0.514          |

**Supplemental Table 2. Study cohort gene expression profiling**

| Sample     | FIGO stage | Molecular subtype | CD3 intraepithelial count (cells/mm <sup>2</sup> ) | Immunoscore | Infiltration |
|------------|------------|-------------------|----------------------------------------------------|-------------|--------------|
| Sample 1   | FIGO I/II  | HPVpos            | 110,04                                             | D           | low          |
| Sample 2   | FIGO I/II  | HPVneg/p53mut     | 34,27                                              | D           | low          |
| Sample 3   | FIGO I/II  | HPVneg/p53wt      | 36,03                                              | D           | low          |
| Sample 4   | FIGO I/II  | HPVneg/p53mut     | 13,78                                              | D           | low          |
| Sample 5   | FIGO I/II  | HPVpos            | 119,38                                             | D           | low          |
| Sample 6   | FIGO I/II  | HPVneg/p53mut     | 12,55                                              | D           | low          |
| Sample 7   | FIGO I/II  | HPVneg/p53wt      | 35,19                                              | D           | low          |
| Sample 8   | FIGO I/II  | HPVneg/p53wt      | 89,58                                              | D           | low          |
| Sample 9   | FIGO I/II  | HPVneg/p53mut     | 33,74                                              | AI          | low          |
| Sample 10  | FIGO I/II  | HPVpos            | 149,64                                             | AI          | low          |
| Sample 11  | FIGO I/II  | HPVneg/p53wt      | 60,61                                              | AI          | low          |
| Sample 12  | FIGO I/II  | HPVneg/p53wt      | 198,15                                             | AI          | low          |
| Sample 13  | FIGO I/II  | HPVneg/p53mut     | 39,76                                              | AI          | low          |
| Sample 14  | FIGO I/II  | HPVpos            | 35,47                                              | AI          | low          |
| Sample 15  | FIGO I/II  | HPVpos            | 198,73                                             | AI          | low          |
| Sample 16  | FIGO I/II  | HPVneg/p53mut     | 600,36                                             | AE          | high         |
| Sample 17  | FIGO I/II  | HPVneg/p53mut     | 580,32                                             | AE          | high         |
| Sample 18  | FIGO I/II  | HPVneg/p53mut     | 340,2                                              | AE          | high         |
| Sample 19  | FIGO I/II  | HPVneg/p53wt      | 188,1                                              | AE          | high         |
| Sample 20  | FIGO I/II  | HPVpos            | 573,49                                             | AE          | high         |
| Sample 21  | FIGO I/II  | HPVneg/p53mut     | 248,5                                              | AE          | high         |
| Sample 22  | FIGO I/II  | HPVneg/p53wt      | 1720,56                                            | AE          | high         |
| Sample 23  | FIGO I/II  | HPVneg/p53wt      | 948,03                                             | AE          | high         |
| Sample 24  | FIGO I/II  | HPVneg/p53mut     | 641,09                                             | AE          | high         |
| Sample 25  | FIGO I/II  | HPVpos            | 607,1                                              | AE          | high         |
| Sample 26* | FIGO I/II  | HPVneg/p53wt      | 2719,33                                            | AE          | high         |
| Sample 27  | FIGO I/II  | HPVpos            | 1140,16                                            | I           | high         |
| Sample 28  | FIGO I/II  | HPVpos            | 637,84                                             | I           | high         |
| Sample 29  | FIGO I/II  | HPVpos            | 611,58                                             | I           | high         |
| Sample 30  | FIGO I/II  | HPVneg/p53wt      | 1895,25                                            | I           | high         |
| Sample 31  | FIGO III   | HPVneg/p53mut     | 12,02                                              | D           | low          |
| Sample 32  | FIGO III   | HPVneg/p53mut     | 13,07                                              | D           | low          |
| Sample 33  | FIGO III   | HPVneg/p53mut     | 23,28                                              | D           | low          |
| Sample 34  | FIGO III   | HPVneg/p53mut     | 31,61                                              | D           | low          |
| Sample 35  | FIGO III   | HPVneg/p53mut     | 35,5                                               | D           | low          |
| Sample 36* | FIGO III   | HPVneg/p53mut     | 23,28                                              | D           | low          |
| Sample 37  | FIGO III   | HPVneg/p53mut     | 30,1                                               | AI          | low          |
| Sample 38  | FIGO III   | HPVpos            | 524,47                                             | AI          | low          |
| Sample 39  | FIGO III   | HPVneg/p53mut     | 320,03                                             | AE          | high         |
| Sample 40  | FIGO III   | HPVneg/p53mut     | 571,46                                             | AE          | high         |
| Sample 41  | FIGO III   | HPVpos            | 584,39                                             | I           | high         |
| Sample 42  | FIGO III   | HPVneg/p53wt      | 661,54                                             | I           | high         |

\* excluded for further nanotraining analysis due to poor RNA quality.

D: deserted, AI: altered-immunosuppressed, AE: altered-excluded, I: inflamed

**Supplemental Table 3. Gene lists**

| <b>IO360 panel</b> | <b>Pancaner panel</b> |
|--------------------|-----------------------|
| A2M                | ABL1                  |
| ACVR1C             | ACVR1B                |
| ADAM12             | ACVR1C                |
| ADGRE1             | ACVR2A                |
| ADM                | AKT1                  |
| ADORA2A            | AKT2                  |
| AKT1               | AKT3                  |
| ALDOA              | ALK                   |
| ALDOC              | ALKBH2                |
| ANGPT1             | ALKBH3                |
| ANGPT2             | AMER1                 |
| ANGPTL4            | AMH                   |
| ANLN               | ANGPT1                |
| APC                | APC                   |
| APH1B              | APH1B                 |
| API5               | AR                    |
| APLNR              | ARID1A                |
| APOE               | ARID1B                |
| APOL6              | ARID2                 |
| AQP9               | ARNT2                 |
| AREG               | ASXL1                 |
| ARG1               | ATM                   |
| ARG2               | ATR                   |
| ARID1A             | ATRX                  |
| ARNT2              | AXIN1                 |
| ATF3               | AXIN2                 |
| ATM                | B2M                   |
| AXIN1              | BAD                   |
| AXL                | BAIAP3                |
| B2M                | BAMBI                 |
| BAD                | BAP1                  |
| BAMBI              | BAX                   |
| BATF3              | BCL2                  |
| BAX                | BCL2A1                |
| BBC3               | BCL2L1                |
| BBS1               | BCOR                  |
| BCAT1              | BDNF                  |
| BCL2               | BID                   |
| BCL2L1             | BIRC3                 |
| BCL6B              | BIRC7                 |
| BID                | BMP2                  |
| BIRC3              | BMP4                  |
| BIRC5              | BMP5                  |
| BLK                | BMP6                  |
| BLM                | BMP7                  |
| BMP2               | BMP8A                 |
| BNIP3              | BMPR1B                |
| BNIP3L             | BNIP3                 |

|         |          |
|---------|----------|
| BRCA1   | BRAF     |
| BRCA2   | BRCA1    |
| BRD3    | BRCA2    |
| BRD4    | BRIP1    |
| BRIP1   | C19orf40 |
| BTLA    | CACNA1C  |
| C1QA    | CACNA1D  |
| C1QB    | CACNA1E  |
| C2      | CACNA1G  |
| C5      | CACNA1H  |
| C5AR1   | CACNA2D1 |
| C7      | CACNA2D2 |
| CASP1   | CACNA2D3 |
| CASP3   | CACNA2D4 |
| CASP8   | CACNB2   |
| CASP9   | CACNB3   |
| CBLC    | CACNB4   |
| CCL13   | CACNG1   |
| CCL14   | CACNG4   |
| CCL18   | CACNG6   |
| CCL19   | CALML3   |
| CCL2    | CALML5   |
| CCL20   | CALML6   |
| CCL21   | CAMK2B   |
| CCL22   | CAPN2    |
| CCL3/L1 | CARD11   |
| CCL4    | CASP10   |
| CCL5    | CASP12   |
| CCL7    | CASP3    |
| CCL8    | CASP7    |
| CCNA1   | CASP8    |
| CCNB1   | CASP9    |
| CCND1   | CBL      |
| CCND2   | CBLC     |
| CCND3   | CCNA1    |
| CCNE1   | CCNA2    |
| CCNO    | CCNB1    |
| CCR2    | CCNB3    |
| CCR4    | CCND1    |
| CCR5    | CCND2    |
| CD14    | CCND3    |
| CD163   | CCNE1    |
| CD19    | CCNE2    |
| CD1C    | CCNO     |
| CD2     | CCR7     |
| CD209   | CD14     |
| CD244   | CD19     |
| CD247   | CD40     |
| CD27    | CDC14A   |
| CD274   | CDC14B   |

|         |         |
|---------|---------|
| CD276   | CDC25A  |
| CD28    | CDC25B  |
| CD300A  | CDC25C  |
| CD36    | CDC6    |
| CD38    | CDC7    |
| CD3D    | CDH1    |
| CD3E    | CDK2    |
| CD3G    | CDK4    |
| CD4     | CDK6    |
| CD40    | CDKN1A  |
| CD40LG  | CDKN1B  |
| CD44    | CDKN1C  |
| CD45RA  | CDKN2A  |
| CD45RB  | CDKN2B  |
| CD45RO  | CDKN2C  |
| CD47    | CDKN2D  |
| CD48    | CEBPA   |
| CD5     | CEBPE   |
| CD58    | CHAD    |
| CD6     | CHEK1   |
| CD68    | CHEK2   |
| CD69    | CHUK    |
| CD7     | CIC     |
| CD70    | CLCF1   |
| CD74    | CNTRF   |
| CD79A   | COL11A1 |
| CD79B   | COL11A2 |
| CD80    | COL1A1  |
| CD84    | COL1A2  |
| CD86    | COL24A1 |
| CD8A    | COL27A1 |
| CD8B    | COL2A1  |
| CD96    | COL3A1  |
| CDC20   | COL4A3  |
| CDC25C  | COL4A4  |
| CDH1    | COL4A5  |
| CDH11   | COL4A6  |
| CDH2    | COL5A1  |
| CDH5    | COL5A2  |
| CDK2    | COL6A6  |
| CDK6    | COMP    |
| CDKN1A  | CREB3L1 |
| CDKN1C  | CREB3L3 |
| CDKN2A  | CREB3L4 |
| CDKN2B  | CREB5   |
| CEACAM3 | CREBBP  |
| CEBPB   | CRLF2   |
| CENPF   | CSF1R   |
| CEP55   | CSF2    |
| CES3    | CSF3    |

|         |          |
|---------|----------|
| CHUK    | CSF3R    |
| CLEC14A | CTNNB1   |
| CLEC4E  | CUL1     |
| CLEC5A  | CXXC4    |
| CLEC7A  | CYLD     |
| CLECL1  | DAXX     |
| CMKLR1  | DDB2     |
| CNTFR   | DDIT3    |
| COL11A1 | DDIT4    |
| COL11A2 | DKK1     |
| COL17A1 | DKK2     |
| COL4A5  | DKK4     |
| COL5A1  | DLL1     |
| COL6A3  | DLL3     |
| COMP    | DLL4     |
| CPA3    | DNMT1    |
| CRABP2  | DNMT3A   |
| CSF1    | DTX1     |
| CSF1R   | DTX3     |
| CSF2    | DTX4     |
| CSF2RB  | DUSP10   |
| CSF3    | DUSP2    |
| CSF3R   | DUSP4    |
| CST2    | DUSP5    |
| CTAG1B  | DUSP6    |
| CTLA4   | DUSP8    |
| CTNNB1  | E2F1     |
| CTSS    | E2F5     |
| CTSW    | EFNA1    |
| CX3CL1  | EFNA2    |
| CX3CR1  | EFNA3    |
| CXCL1   | EFNA5    |
| CXCL10  | EGF      |
| CXCL11  | EGFR     |
| CXCL12  | EIF4EBP1 |
| CXCL13  | ENDOG    |
| CXCL14  | EP300    |
| CXCL16  | EPHA2    |
| CXCL2   | EPO      |
| CXCL3   | EPOR     |
| CXCL5   | ERBB2    |
| CXCL6   | ERCC2    |
| CXCL8   | ERCC6    |
| CXCL9   | ETS2     |
| CXCR2   | ETV1     |
| CXCR3   | ETV4     |
| CXCR4   | ETV7     |
| CXCR6   | EYA1     |
| CXorf36 | EZH2     |
| CYBB    | FANCA    |

|          |       |
|----------|-------|
| DAB2     | FANCB |
| DDB2     | FANCC |
| DEFB134  | FANCE |
| DEPTOR   | FANCF |
| DKK1     | FANCG |
| DLL1     | FANCL |
| DLL4     | FAS   |
| DNMT1    | FASLG |
| DPP4     | FBXW7 |
| DTX3L    | FEN1  |
| DTX4     | FGF1  |
| DUSP1    | FGF10 |
| DUSP2    | FGF11 |
| DUSP5    | FGF12 |
| E2F3     | FGF13 |
| EDN1     | FGF14 |
| EGF      | FGF16 |
| EGFR     | FGF17 |
| EGR1     | FGF18 |
| EIF2AK2  | FGF19 |
| EIF2B4   | FGF2  |
| EIF4EBP1 | FGF20 |
| EIF5AL1  | FGF21 |
| ELOB     | FGF22 |
| ENO1     | FGF23 |
| ENTPD1   | FGF3  |
| EOMES    | FGF4  |
| EPCAM    | FGF5  |
| EPM2AIP1 | FGF6  |
| ERBB2    | FGF7  |
| ERO1A    | FGF8  |
| ESR1     | FGF9  |
| EXO1     | FGFR1 |
| EZH2     | FGFR2 |
| F2RL1    | FGFR3 |
| FADD     | FGFR4 |
| FAM124B  | FIGF  |
| FAM30A   | FLNA  |
| FANCA    | FLNC  |
| FAP      | FLT1  |
| FAS      | FLT3  |
| FASLG    | FN1   |
| FBP1     | FOS   |
| FCAR     | FOSL1 |
| FCGR1A   | FOXL2 |
| FCGR2A   | FOXO4 |
| FCGR2B   | FST   |
| FCGR3A/B | FUBP1 |
| FCGRT    | FUT8  |
| FCN1     | FZD10 |

|        |          |
|--------|----------|
| FCRL2  | FZD2     |
| FGF13  | FZD3     |
| FGF18  | FZD7     |
| FGF9   | FZD8     |
| FGFR1  | FZD9     |
| FLNB   | GADD45A  |
| FLT1   | GADD45B  |
| FOSL1  | GADD45G  |
| FOXP3  | GAS1     |
| FPR1   | GATA1    |
| FPR3   | GATA2    |
| FSTL3  | GATA3    |
| FUT4   | GDF6     |
| FYN    | GHR      |
| FZD8   | GLI1     |
| FZD9   | GLI3     |
| GAS1   | GNA11    |
| GBP1   | GNAQ     |
| GBP2   | GNAS     |
| GBP4   | GNG12    |
| GHR    | GNG4     |
| GIMAP4 | GNG7     |
| GIMAP6 | GNGT1    |
| GLI1   | GPC4     |
| GLS    | GRB2     |
| GLUD1  | GRIA3    |
| GLUL   | GRIN1    |
| GMIP   | GRIN2A   |
| GNG4   | GRIN2B   |
| GPLY   | GSK3B    |
| GOT1   | GTF2H3   |
| GOT2   | GZMB     |
| GPC4   | H2AFX    |
| GPR160 | H3F3A    |
| GPSM3  | H3F3C    |
| GZMA   | HDAC1    |
| GZMB   | HDAC10   |
| GZMH   | HDAC11   |
| GZMK   | HDAC2    |
| GZMM   | HDAC4    |
| H2AFX  | HDAC5    |
| HAVCR2 | HDAC6    |
| HCK    | HELLS    |
| HDAC11 | HES1     |
| HDAC3  | HES5     |
| HDAC4  | HGF      |
| HDAC5  | HHEX     |
| HDC    | HHIP     |
| HELLS  | HIST1H3B |
| HERC6  | HIST1H3G |



|          |          |
|----------|----------|
| HES1     | HIST1H3H |
| HEY1     | HMGA1    |
| HIF1A    | HMGA2    |
| HK1      | HNF1A    |
| HK2      | HOXA10   |
| HLA-A    | HOXA11   |
| HLA-B    | HOXA9    |
| HLA-C    | HPGD     |
| HLA-DMA  | HRAS     |
| HLA-DMB  | HSP90B1  |
| HLA-DOA  | HSPA1A   |
| HLA-DOB  | HSPA2    |
| HLA-DPA1 | HSPA6    |
| HLA-DPB1 | HSPB1    |
| HLA-DQA1 | IBSP     |
| HLA-DQA2 | ID1      |
| HLA-DQB1 | ID2      |
| HLA-DRA  | ID4      |
| HLA-DRB1 | IDH1     |
| HLA-DRB5 | IDH2     |
| HLA-E    | IFNA17   |
| HLA-F    | IFNA2    |
| HMGA1    | IFNA7    |
| HMGB1    | IFNG     |
| HNF1A    | IGF1     |
| HRAS     | IGF1R    |
| HSD11B1  | IGFBP3   |
| ICAM1    | IKBKB    |
| ICAM2    | IKBKG    |
| ICAM3    | IL10     |
| ICAM5    | IL11     |
| ICOS     | IL11RA   |
| ICOSLG   | IL12A    |
| ID4      | IL12B    |
| IDO1     | IL12RB2  |
| IER3     | IL13     |
| IFI16    | IL13RA2  |
| IFI27    | IL15     |
| IFI35    | IL19     |
| IFI6     | IL1A     |
| IFIH1    | IL1B     |
| IFIT1    | IL1R1    |
| IFIT2    | IL1R2    |
| IFIT3    | IL1RAP   |
| IFITM1   | IL20RA   |
| IFITM2   | IL20RB   |
| IFNA1    | IL22RA1  |
| IFNAR1   | IL22RA2  |
| IFNG     | IL23A    |
| IFNGR1   | IL23R    |

|         |       |
|---------|-------|
| IFNGR2  | IL24  |
| IGF2R   | IL2RA |
| IHH     | IL2RB |
| IKBKB   | IL3   |
| IKBKG   | IL3RA |
| IL10    | IL5RA |
| IL10RA  | IL6   |
| IL11    | IL6R  |
| IL11RA  | IL7   |
| IL12RB2 | IL7R  |
| IL15    | IL8   |
| IL16    | INHBA |
| IL17A   | INHBB |
| IL18    | IRAK2 |
| IL18R1  | IRAK3 |
| IL1A    | IRS1  |
| IL1B    | ITGA2 |
| IL1R2   | ITGA3 |
| IL1RN   | ITGA6 |
| IL2     | ITGA7 |
| IL21R   | ITGA8 |
| IL22RA1 | ITGA9 |
| IL24    | ITGB3 |
| IL2RA   | ITGB4 |
| IL2RB   | ITGB6 |
| IL2RG   | ITGB7 |
| IL32    | ITGB8 |
| IL33    | JAG1  |
| IL34    | JAG2  |
| IL4     | JAK1  |
| IL6     | JAK2  |
| IL6R    | JAK3  |
| IL7R    | JUN   |
| INHBA   | KAT2B |
| IRF1    | KDM5C |
| IRF2    | KDM6A |
| IRF3    | KIT   |
| IRF4    | KITLG |
| IRF5    | KLF4  |
| IRF7    | KMT2C |
| IRF8    | KMT2D |
| IRF9    | KRAS  |
| ISG15   | LAMA1 |
| ITGA1   | LAMA3 |
| ITGA2   | LAMA5 |
| ITGA4   | LAMB3 |
| ITGA6   | LAMB4 |
| ITGAE   | LAMC2 |
| ITGAL   | LAMC3 |
| ITGAM   | LAT   |

|           |          |
|-----------|----------|
| ITGAV     | LEF1     |
| ITGAX     | LEFTY1   |
| ITGB2     | LEFTY2   |
| ITGB3     | LEP      |
| ITGB8     | LEPR     |
| ITPK1     | LFNG     |
| JAG1      | LIF      |
| JAG2      | LIFR     |
| JAK1      | LIG4     |
| JAK2      | LRP2     |
| JAK3      | LTBP1    |
| KAT2B     | MAD2L2   |
| KDR       | MAML2    |
| KIF2C     | MAP2K1   |
| KIR2DL3   | MAP2K2   |
| KIR3DL1   | MAP2K4   |
| KIR3DL2   | MAP2K6   |
| KIT       | MAP3K1   |
| KLRB1     | MAP3K12  |
| KLRD1     | MAP3K13  |
| KLRK1     | MAP3K14  |
| KRAS      | MAP3K5   |
| LAG3      | MAP3K8   |
| LAIR1     | MAPK1    |
| LAMA1     | MAPK10   |
| LAMB3     | MAPK12   |
| LAMC2     | MAPK3    |
| LCK       | MAPK8    |
| LDHA      | MAPK8IP1 |
| LDHB      | MAPK8IP2 |
| LGALS9    | MAPK9    |
| LIF       | MAPT     |
| LILRA1    | MCM2     |
| LILRA3    | MCM4     |
| LILRA5    | MCM5     |
| LILRB2    | MCM7     |
| LILRB4    | MDC1     |
| LOXL2     | MDM2     |
| LRRC32    | MECOM    |
| LTB       | MED12    |
| LTBP1     | MEN1     |
| LY9       | MET      |
| LY96      | MFNG     |
| LYZ       | MGMT     |
| MAGEA1    | MLF1     |
| MAGEA12   | MLH1     |
| MAGEA3/A6 | MLLT3    |
| MAGEA4    | MLLT4    |
| MAGEB2    | MMP3     |
| MAGEC1    | MMP7     |

|          |        |
|----------|--------|
| MAGEC2   | MMP9   |
| MAML2    | MNAT1  |
| MAP3K12  | MPL    |
| MAP3K5   | MPO    |
| MAP3K7   | MSH2   |
| MAP3K8   | MSH6   |
| MAPK10   | MTOR   |
| MARCO    | MUTYH  |
| MB21D1   | MYB    |
| MELK     | MYC    |
| MET      | MYCN   |
| MFGE8    | MYD88  |
| MFNG     | NASP   |
| MGMT     | NBN    |
| MICA     | NCOR1  |
| MICB     | NF1    |
| MKI67    | NF2    |
| MLANA    | NFATC1 |
| MLH1     | NFE2L2 |
| MMP1     | NFKB1  |
| MMP7     | NFKBIA |
| MMP9     | NFKBIZ |
| MMRN2    | NGF    |
| MRC1     | NGFR   |
| MRE11    | NKD1   |
| MS4A1    | NODAL  |
| MS4A2    | NOG    |
| MS4A4A   | NOS3   |
| MS4A6A   | NOTCH1 |
| MSH2     | NOTCH2 |
| MSH6     | NOTCH3 |
| MTOR     | NPM1   |
| MX1      | NPM2   |
| MXI1     | NR4A1  |
| MYC      | NR4A3  |
| MYCT1    | NRAS   |
| MYD88    | NSD1   |
| NBN      | NTF3   |
| NCAM1    | NTHL1  |
| NCR1     | NTRK1  |
| NDUFA4L2 | NTRK2  |
| NECTIN1  | NUMBL  |
| NECTIN2  | NUPR1  |
| NEIL1    | OSM    |
| NF1      | PAK3   |
| NFAM1    | PAK7   |
| NFATC2   | PAX3   |
| NFIL3    | PAX5   |
| NFKB1    | PAX8   |
| NFKB2    | PBRM1  |

|          |          |
|----------|----------|
| NFKBIA   | PBX1     |
| NFKBIE   | PBX3     |
| NGFR     | PCK1     |
| NID2     | PCNA     |
| NKG7     | PDGFA    |
| NLRC5    | PDGFB    |
| NLRP3    | PDGFC    |
| NOD2     | PDGFD    |
| NOS2     | PDGFRA   |
| NOTCH1   | PDGFRB   |
| NOTCH2   | PGF      |
| NRAS     | PHF6     |
| NT5E     | PIK3CA   |
| OAS1     | PIK3CB   |
| OAS2     | PIK3CD   |
| OAS3     | PIK3CG   |
| OASL     | PIK3R1   |
| OLFML2B  | PIK3R2   |
| OLR1     | PIK3R3   |
| OTOA     | PIK3R5   |
| P2RY13   | PIM1     |
| P4HA1    | PITX2    |
| P4HA2    | PKMYT1   |
| PALMD    | PLA1A    |
| PARP12   | PLA2G10  |
| PARP4    | PLA2G2A  |
| PARP9    | PLA2G3   |
| PC       | PLA2G4A  |
| PCK2     | PLA2G4C  |
| PDCD1    | PLA2G4E  |
| PDCD1LG2 | PLA2G4F  |
| PDGFA    | PLA2G5   |
| PDGFB    | PLAT     |
| PDGFRB   | PLAU     |
| PDK1     | PLCB1    |
| PDZK1IP1 | PLCB4    |
| PECAM1   | PLCE1    |
| PF4      | PLCG2    |
| PFKFB3   | PLD1     |
| PFKM     | PML      |
| PGPEP1   | POLB     |
| PIAS4    | POLD1    |
| PIK3CA   | POLD4    |
| PIK3CD   | POLE2    |
| PIK3CG   | POLR2D   |
| PIK3R1   | POLR2H   |
| PIK3R2   | POLR2J   |
| PIK3R5   | PPARG    |
| PKM      | PPARGC1A |
| PLA1A    | PPP2CB   |

|          |         |
|----------|---------|
| PLA2G2A  | PPP2R1A |
| PLOD2    | PPP2R2B |
| PMS2     | PPP2R2C |
| PNOC     | PPP3CA  |
| POLD1    | PPP3CB  |
| PPARG    | PPP3CC  |
| PPARGC1B | PPP3R1  |
| PRF1     | PPP3R2  |
| PRKAA2   | PRDM1   |
| PRKACB   | PRKAA2  |
| PRKCA    | PRKACA  |
| PRKX     | PRKACB  |
| PRLR     | PRKACG  |
| PROM1    | PRKAR1B |
| PRR5     | PRKAR2A |
| PSMB10   | PRKAR2B |
| PSMB5    | PRKCA   |
| PSMB8    | PRKCB   |
| PSMB9    | PRKCG   |
| PTCD2    | PRKDC   |
| PTEN     | PRKX    |
| PTGER4   | PRL     |
| PTGS2    | PRLR    |
| PTPN11   | PRMT8   |
| PTPRC    | PROM1   |
| PVR      | PTCH1   |
| PVRIG    | PTCRA   |
| RAD50    | PTEN    |
| RAD51    | PTPN11  |
| RAD51C   | PTPN5   |
| RASAL1   | PTPRR   |
| RASGRF1  | PTTG2   |
| RB1      | RAC1    |
| RBL2     | RAC2    |
| RELA     | RAC3    |
| RELB     | RAD21   |
| RELN     | RAD50   |
| REN      | RAD51   |
| RICTOR   | RAD52   |
| RIPK1    | RAF1    |
| RIPK2    | RASA4   |
| RIPK3    | RASAL1  |
| RNLS     | RASGRF1 |
| ROBO4    | RASGRF2 |
| ROCK1    | RASGRP1 |
| ROR2     | RASGRP2 |
| RORC     | RB1     |
| RPL23    | RBX1    |
| RPL7A    | RELA    |
| RPS6KB1  | RELN    |

|          |         |
|----------|---------|
| RPTOR    | RET     |
| RRM2     | RFC3    |
| RSAD2    | RFC4    |
| RUNX3    | RHOA    |
| S100A12  | RIN1    |
| S100A8   | RNF43   |
| S100A9   | RPA3    |
| SAMD9    | RPS27A  |
| SAMSN1   | RPS6KA5 |
| SBNO2    | RPS6KA6 |
| SELE     | RRAS2   |
| SELL     | RUNX1   |
| SELP     | RUNX1T1 |
| SERPINA1 | RXRG    |
| SERPINB5 | SETBP1  |
| SERPINH1 | SETD2   |
| SFRP1    | SF3B1   |
| SFRP4    | SFN     |
| SFXN1    | SFRP1   |
| SGK1     | SFRP2   |
| SH2D1A   | SFRP4   |
| SHC2     | SGK2    |
| SIGLEC1  | SHC1    |
| SIGLEC5  | SHC2    |
| SIGLEC8  | SHC3    |
| SIRPA    | SHC4    |
| SIRPB2   | SIN3A   |
| SLAMF7   | SIRT4   |
| SLC11A1  | SIX1    |
| SLC16A1  | SKP1    |
| SLC1A5   | SKP2    |
| SLC2A1   | SMAD2   |
| SLC7A5   | SMAD3   |
| SMAD5    | SMAD4   |
| SMAP1    | SMAD9   |
| SNAI1    | SMARCA4 |
| SNCA     | SMARCB1 |
| SOCS1    | SMC1A   |
| SOX10    | SMC1B   |
| SOX11    | SMC3    |
| SOX2     | SMO     |
| SPIB     | SOCS1   |
| SPP1     | SOCS2   |
| SPRY4    | SOCS3   |
| SREBF1   | SOS1    |
| SRP54    | SOS2    |
| STAT1    | SOST    |
| STAT2    | SOX17   |
| STAT3    | SOX9    |
| STAT4    | SP1     |

|           |           |
|-----------|-----------|
| STC1      | SPOP      |
| SYK       | SPP1      |
| TAF3      | SPRY1     |
| TAP1      | SPRY2     |
| TAP2      | SPRY4     |
| TAPBP     | SRSF2     |
| TAPBPL    | SSX1      |
| TBX21     | STAG2     |
| TBXAS1    | STAT1     |
| TCF3      | STAT3     |
| TCL1A     | STAT4     |
| TDO2      | STK11     |
| TGFB1     | STMN1     |
| TGFB2     | SUV39H2   |
| TGFB3     | SYK       |
| TGFBR1    | TBL1XR1   |
| TGFBR2    | TCF3      |
| THBD      | TCF7L1    |
| THBS1     | TCL1B     |
| THY1      | TET2      |
| TICAM1    | TFDP1     |
| TIE1      | TGFB1     |
| TIGIT     | TGFB2     |
| TLR1      | TGFB3     |
| TLR2      | TGFBR2    |
| TLR3      | THBS1     |
| TLR4      | THBS4     |
| TLR5      | THEM4     |
| TLR7      | TIAM1     |
| TLR8      | TLR2      |
| TLR9      | TLR4      |
| TMEM140   | TLX1      |
| TMEM173   | TMPRSS2   |
| TNF       | TNC       |
| TNFAIP3   | TNF       |
| TNFAIP6   | TNFAIP3   |
| TNFRSF10B | TNFRSF10A |
| TNFRSF10C | TNFRSF10B |
| TNFRSF10D | TNFRSF10C |
| TNFRSF11A | TNFRSF10D |
| TNFRSF11B | TNFSF10   |
| TNFRSF14  | TNN       |
| TNFRSF17  | TNR       |
| TNFRSF18  | TP53      |
| TNFRSF1A  | TPO       |
| TNFRSF1B  | TRAF7     |
| TNFRSF25  | TSC1      |
| TNFRSF4   | TSHR      |
| TNFRSF8   | TSLP      |
| TNFRSF9   | TSPAN7    |



|           |                                 |
|-----------|---------------------------------|
| TNFSF10   | TTK                             |
| TNFSF12   | U2AF1                           |
| TNFSF13   | UBB                             |
| TNFSF13B  | UBE2T                           |
| TNFSF18   | UTY                             |
| TNFSF4    | VEGFA                           |
| TNFSF8    | VEGFC                           |
| TNFSF9    | VHL                             |
| TNKS      | WEE1                            |
| TP53      | WHSC1                           |
| TPI1      | WHSC1L1                         |
| TPM1      | WIF1                            |
| TPSAB1/B2 | WNT10A                          |
| TRAF1     | WNT10B                          |
| TRAT1     | WNT11                           |
| TREM1     | WNT16                           |
| TREM2     | WNT2                            |
| TRIM21    | WNT2B                           |
| TSLP      | WNT3                            |
| TTC30A    | WNT4                            |
| TWF1      | WNT5A                           |
| TWIST1    | WNT5B                           |
| TWIST2    | WNT6                            |
| TYMP      | WNT7A                           |
| TYMS      | WNT7B                           |
| UBA7      | WT1                             |
| UBE2C     | XPA                             |
| UBE2T     | XRCC4                           |
| ULBP2     | ZAK                             |
| VCAM1     | ZBTB16                          |
| VCAN      | ZBTB32                          |
| VEGFA     | ZIC2                            |
| VEGFB     | <b>Internal Reference Genes</b> |
| VEGFC     | ACAD9                           |
| VHL       | AGK                             |
| VSIR      | AMMECR1L                        |
| VTCN1     | C10orf76                        |
| WDR76     | CC2D1B                          |
| WNT10A    | CNOT10                          |
| WNT11     | CNOT4                           |
| WNT2      | COG7                            |
| WNT2B     | DDX50                           |
| WNT3A     | DHX16                           |
| WNT4      | DNAJC14                         |
| WNT5A     | EDC3                            |
| WNT5B     | EIF2B4                          |
| WNT7B     | ERCC3                           |
| XCL1/2    | FCF1                            |
| ZAP70     | FTSJ2                           |
| ZC3H12A   | GPATCH3                         |

|                                 |          |
|---------------------------------|----------|
| ZEB1                            | HDAC3    |
| ZEB2                            | MRPS5    |
| <b>Internal Reference Genes</b> | MTMR14   |
| ABCF1                           | NOL7     |
| DNAJC14                         | NUBP1    |
| ERCC3                           | PIAS1    |
| G6PD                            | PIK3R4   |
| GUSB                            | PRPF38A  |
| MRPL19                          | RBM45    |
| NRDE2                           | SAP130   |
| OAZ1                            | SF3A3    |
| POLR2A                          | SLC4A1AP |
| PSMC4                           | TLK2     |
| PUM1                            | TMUB2    |
| SDHA                            | TRIM39   |
| SF3A1                           | TTC31    |
| STK11IP                         | USP39    |
| TBC1D10B                        | VPS33B   |
| TBP                             | ZC3H14   |
| TFRC                            | ZKSCAN5  |
| TLK2                            | ZNF143   |
| TMUB2                           | ZNF346   |
| UBB                             | ZNF384   |

**Supplemental table 4. Automated cell type profiling**

| Cell type                        | Number of genes | Genes                                                                |
|----------------------------------|-----------------|----------------------------------------------------------------------|
| B cells                          | 8               | <i>FCRL2, TNFRSF17, PNOX, MS4A1, TCL1A, CD19, SPIB, FAM30A</i>       |
| CD45 <sup>+</sup> cells          | 1               | <i>CD45RA, PTPRC, CD45RO</i>                                         |
| CD8 <sup>+</sup> T cells         | 2               | <i>CD8A, CD8B</i>                                                    |
| Cytotoxic cells                  | 10              | <i>CTSW, NKG7, KLRK1, PRF1, GZMA, GZMB, GZMH, KLRD1, KLRB1, GNLY</i> |
| DCs                              | 3               | <i>CCL13, CD209, HSD11B1</i>                                         |
| Exhausted CD8 <sup>+</sup> cells | 4               | <i>CD244, LAG3, EOMES, PTGER4</i>                                    |
| Macrophages                      | 4               | <i>CD68, CD84, MS4A4A, CD163</i>                                     |
| Mast cells                       | 3               | <i>HDC, TPSAB1/B2, MS4A2, CPA3</i>                                   |
| Neutrophils                      | 6               | <i>FPR1, FCAR, FCGR3A/B, CSF3R, CEACAM3, S100A12</i>                 |
| NK CD56dim cells                 | 4               | <i>IL21R</i>                                                         |
| NK cells                         | 1               | <i>XCL1/2, NCR1</i>                                                  |
| T cells                          | 6               | <i>TRAT1, CD3D, CD3G, CD6, CD3E, SH2D1A</i>                          |
| <i>TBX21</i> <sup>+</sup> cells  | 1               | <i>TBX21</i>                                                         |
| Tregs                            | 1               | <i>FOXP3</i>                                                         |

Supplemental Table 5. Uni- and multivariate analysis for overall survival and recurrence-free period.

| Variable                                   | 5-years overall survival |              |             |              | 5-years recurrence-free period |              |             |              |
|--------------------------------------------|--------------------------|--------------|-------------|--------------|--------------------------------|--------------|-------------|--------------|
|                                            | HR crude                 | p-value      | HR adjusted | p-value      | HR crude                       | p-value      | HR adjusted | p-value      |
| Intraepithelial CD3+ (low/high)            | 12.504                   | <b>0.001</b> | 8.310       | <b>0.005</b> | 2.615                          | <b>0.014</b> | 2.573       | <b>0.025</b> |
| Stage (early/late)                         |                          |              | 1.936       | 0.116        | 0.811                          | 0.589        | 0.533       | 0.119        |
| Molecular subtype                          |                          |              |             |              |                                |              |             |              |
| HPVpos                                     | REF                      | 0.056        | REF         | 0.452        | REF                            | 0.192        | REF         | 0.402        |
| HPVneg/p53wt                               | 5.944                    | 0.096        | 3.364       | 0.262        | 2.194                          | 0.246        | 2.034       | 0.298        |
| HPVneg/p53mut                              | 9.843                    | <b>0.026</b> | 3.747       | 0.208        | 3.012                          | 0.076        | 2.413       | 0.177        |
| Intraepithelial CD3+CD8-Foxp3- (low/high)  | 17.17                    | <b>0.005</b> | 12.146      | <b>0.015</b> | 3.490                          | <b>0.006</b> | 3.213       | <b>0.013</b> |
| Stage (early/late)                         |                          |              | 2.287       | 0.050        | 0.811                          | 0.589        | 0.589       | 0.184        |
| Molecular subtype                          |                          |              |             |              |                                |              |             |              |
| HPVpos                                     | REF                      | 0.056        | REF         | 0.404        | REF                            | 0.192        | REF         | 0.354        |
| HPVneg/p53wt                               | 5.944                    | 0.096        | 3.551       | 0.240        | 2.194                          | 0.246        | 2.005       | 0.308        |
| HPVneg/p53mut                              | 9.843                    | <b>0.026</b> | 4.086       | 0.180        | 3.012                          | <b>0.076</b> | 2.508       | 0.153        |
| Intraepithelial CD3+CD8+ Foxp3- (low/high) | 4.052                    | <b>0.001</b> | 3.061       | <b>0.008</b> | 2.685                          | <b>0.017</b> | 2.168       | 0.069        |
| Stage (early/late)                         |                          |              | 2.298       | 0.053        | 0.811                          | 0.589        | 0.685       | 0.342        |
| Molecular subtype                          |                          |              |             |              |                                |              |             |              |
| HPVpos                                     | REF                      | 0.056        | REF         | 0.276        | REF                            | 0.192        | REF         | 0.258        |
| HPVneg/p53wt                               | 5.944                    | 0.096        | 4.988       | 0.134        | 2.194                          | 0.246        | 1.979       | 0.320        |
| HPVneg/p53mut                              | 9.843                    | <b>0.026</b> | 5.319       | 0.110        | 3.012                          | 0.076        | 2.168       | 0.112        |

HR = hazard ratio

Supplemental table 6A. List of single gene RNA that significantly differ between molecular subtypes using oncogenic pathway panel in 29 early-stage V5CC.

|                                  | Gene                              | Log2 fold change | std error (log2) | Lower confidence limit (log2) | Upper confidence limit (log2) | Linear fold change | Lower confidence limit (linear) | Upper confidence limit (linear) | BH p-value | Pathways                                              |                              |
|----------------------------------|-----------------------------------|------------------|------------------|-------------------------------|-------------------------------|--------------------|---------------------------------|---------------------------------|------------|-------------------------------------------------------|------------------------------|
| HPV/posV5CC vs HPV/negV5CC/p53wt | <i>BRIP1</i>                      | -1.04            | 0.305            | -1.64                         | -0.447                        | 0.485              | 0.321                           | 0.734                           | 0.0359     | DNA Damage - Repair                                   |                              |
|                                  | <i>CACNA2D3</i>                   | -2.01            | 0.612            | -3.21                         | -0.81                         | 0.248              | 0.108                           | 0.57                            | 0.0403     | MAPK                                                  |                              |
|                                  | <i>CACNG4</i>                     | -2.02            | 0.647            | -3.29                         | -0.755                        | 0.246              | 0.102                           | 0.592                           | 0.0496     | MAPK                                                  |                              |
|                                  | <i>CCNE2</i>                      | -1.45            | 0.246            | -1.93                         | -0.965                        | 0.367              | 0.262                           | 0.512                           | 0.000564   | Cell Cycle - Apoptosis, PI3K                          |                              |
|                                  | <i>CDC25C</i>                     | -1.01            | 0.257            | -1.51                         | -0.509                        | 0.496              | 0.35                            | 0.703                           | 0.0138     | Cell Cycle - Apoptosis                                |                              |
|                                  | <i>CDKN1C</i>                     | -1.45            | 0.442            | -2.31                         | -0.58                         | 0.367              | 0.201                           | 0.669                           | 0.0403     | Cell Cycle - Apoptosis                                |                              |
|                                  | <i>CDKN2A</i>                     | -2.64            | 0.574            | -3.76                         | -1.51                         | 0.161              | 0.0737                          | 0.35                            | 0.00376    | Cell Cycle - Apoptosis, Driver Gene                   |                              |
|                                  | <i>CREB3L4</i>                    | -1.03            | 0.319            | -1.65                         | -0.4                          | 0.491              | 0.318                           | 0.758                           | 0.0437     | PI3K                                                  |                              |
|                                  | <i>E2F1</i>                       | -1.22            | 0.265            | -1.74                         | -0.704                        | 0.428              | 0.298                           | 0.614                           | 0.00376    | Cell Cycle - Apoptosis                                |                              |
|                                  | <i>FANCA</i>                      | -1.07            | 0.206            | -1.47                         | -0.661                        | 0.478              | 0.361                           | 0.632                           | 0.0015     | DNA Damage - Repair                                   |                              |
|                                  | <i>FANCB</i>                      | -1.21            | 0.256            | -1.71                         | -0.71                         | 0.432              | 0.305                           | 0.611                           | 0.00294    | DNA Damage - Repair                                   |                              |
|                                  | <i>GADD45B</i>                    | 1.26             | 0.266            | 0.744                         | 1.79                          | 2.4                | 1.68                            | 3.45                            | 0.00294    | Cell Cycle - Apoptosis, MAPK                          |                              |
|                                  | <i>MCM2</i>                       | -1.25            | 0.238            | -1.72                         | -0.785                        | 0.42               | 0.304                           | 0.581                           | 0.00133    | Cell Cycle - Apoptosis                                |                              |
|                                  | <i>MCM5</i>                       | -1.1             | 0.219            | -1.53                         | -0.672                        | 0.466              | 0.346                           | 0.628                           | 0.00175    | Cell Cycle - Apoptosis                                |                              |
|                                  | <i>MECOM</i>                      | -4.49            | 0.833            | -6.13                         | -2.86                         | 0.0443             | 0.0143                          | 0.137                           | 0.00103    | MAPK                                                  |                              |
|                                  | <i>MMP3</i>                       | 2.42             | 0.715            | 1.02                          | 3.82                          | 5.36               | 2.03                            | 14.2                            | 0.0375     | Transcriptional Misregulation                         |                              |
|                                  | <i>MYB</i>                        | -2.34            | 0.643            | -3.6                          | -1.08                         | 0.198              | 0.0826                          | 0.474                           | 0.0273     | PI3K                                                  |                              |
|                                  | <i>NASP</i>                       | -1.12            | 0.223            | -1.56                         | -0.686                        | 0.459              | 0.339                           | 0.621                           | 0.00175    | Chromatin Modification                                |                              |
|                                  | <i>POLE2</i>                      | -1.27            | 0.178            | -1.62                         | -0.918                        | 0.416              | 0.326                           | 0.529                           | 9.00E-05   | DNA Damage - Repair                                   |                              |
|                                  | <i>STMN1</i>                      | -1.06            | 0.321            | -1.69                         | -0.434                        | 0.478              | 0.309                           | 0.74                            | 0.0398     | MAPK                                                  |                              |
|                                  | <i>TGFB1</i>                      | 1.19             | 0.218            | 0.76                          | 1.61                          | 2.28               | 1.69                            | 3.06                            | 0.00103    | Cell Cycle - Apoptosis, MAPK, TGF-beta                |                              |
|                                  | <i>WNT5A</i>                      | 1.03             | 0.295            | 0.457                         | 1.61                          | 2.05               | 1.37                            | 3.06                            | 0.0337     | Hedgehog, Wnt                                         |                              |
|                                  | HPV/posV5CC vs HPV/negV5CC/p53mut | <i>BRIP1</i>     | -1.23            | 0.297                         | -1.81                         | -0.644             | 0.428                           | 0.286                           | 0.64       | 0.00837                                               | DNA Damage - Repair          |
|                                  |                                   | <i>CALML3</i>    | 1.59             | 0.485                         | 0.641                         | 2.54               | 3.01                            | 1.56                            | 5.83       | 0.0334                                                | Ras                          |
|                                  |                                   | <i>CCNE2</i>     | -1.26            | 0.239                         | -1.73                         | -0.791             | 0.417                           | 0.302                           | 0.578      | 0.00114                                               | Cell Cycle - Apoptosis, PI3K |
|                                  |                                   | <i>CDC25C</i>    | -1.05            | 0.25                          | -1.54                         | -0.557             | 0.484                           | 0.345                           | 0.68       | 0.0079                                                | Cell Cycle - Apoptosis       |
| <i>CDC7</i>                      |                                   | -1.11            | 0.214            | -1.53                         | -0.688                        | 0.464              | 0.347                           | 0.621                           | 0.0013     | Cell Cycle - Apoptosis                                |                              |
| <i>CDKN1C</i>                    |                                   | -1.36            | 0.43             | -2.2                          | -0.517                        | 0.389              | 0.217                           | 0.699                           | 0.0404     | Cell Cycle - Apoptosis                                |                              |
| <i>CDKN2A</i>                    |                                   | -1.99            | 0.558            | -3.08                         | -0.893                        | 0.252              | 0.118                           | 0.539                           | 0.0214     | Cell Cycle - Apoptosis, Driver Gene                   |                              |
| <i>CDKN2C</i>                    |                                   | -1.17            | 0.279            | -1.72                         | -0.626                        | 0.443              | 0.303                           | 0.648                           | 0.0079     | Cell Cycle - Apoptosis, Transcriptional Misregulation |                              |
| <i>COL4A5</i>                    |                                   | 1.73             | 0.419            | 0.905                         | 2.55                          | 3.31               | 1.87                            | 5.84                            | 0.00837    | PI3K                                                  |                              |
| <i>COL4A6</i>                    |                                   | 1.77             | 0.545            | 0.699                         | 2.84                          | 3.4                | 1.62                            | 7.14                            | 0.0355     | PI3K                                                  |                              |
| <i>E2F1</i>                      |                                   | -1.37            | 0.259            | -1.87                         | -0.859                        | 0.388              | 0.273                           | 0.551                           | 0.00114    | Cell Cycle - Apoptosis                                |                              |
| <i>EGFR</i>                      |                                   | 2.13             | 0.548            | 1.05                          | 3.2                           | 4.36               | 2.07                            | 9.18                            | 0.0145     | Driver Gene, MAPK, PI3K, Ras                          |                              |
| <i>FANCC</i>                     |                                   | -1               | 0.204            | -1.4                          | -0.603                        | 0.499              | 0.379                           | 0.658                           | 0.00232    | DNA Damage - Repair                                   |                              |
| <i>GRIA3</i>                     |                                   | 1.34             | 0.42             | 0.514                         | 2.16                          | 2.53               | 1.43                            | 4.47                            | 0.0391     | Transcriptional Misregulation                         |                              |
| <i>IL24</i>                      |                                   | 1.73             | 0.58             | 0.595                         | 2.87                          | 3.32               | 1.51                            | 7.31                            | 0.0493     | JAK-STAT                                              |                              |
| <i>MECOM</i>                     |                                   | -4.63            | 0.811            | -6.22                         | -3.04                         | 0.0403             | 0.0134                          | 0.121                           | 0.000525   | MAPK                                                  |                              |
| <i>MMP3</i>                      |                                   | 2.46             | 0.696            | 1.09                          | 3.82                          | 5.5                | 2.14                            | 14.1                            | 0.0223     | Transcriptional Misregulation                         |                              |
| <i>MYB</i>                       |                                   | -2.96            | 0.626            | -4.18                         | -1.73                         | 0.129              | 0.0551                          | 0.302                           | 0.00335    | PI3K                                                  |                              |
| <i>NASP</i>                      |                                   | -1.33            | 0.217            | -1.76                         | -0.907                        | 0.397              | 0.295                           | 0.533                           | 0.000214   | Chromatin Modification                                |                              |
| <i>NKD1</i>                      |                                   | 1.06             | 0.321            | 0.436                         | 1.69                          | 2.09               | 1.35                            | 3.23                            | 0.0323     | Wnt                                                   |                              |
| <i>PLAU</i>                      |                                   | 1.33             | 0.396            | 0.556                         | 2.11                          | 2.52               | 1.47                            | 4.32                            | 0.0306     | Transcriptional Misregulation                         |                              |
| <i>POLD4</i>                     |                                   | 1.04             | 0.241            | 0.566                         | 1.51                          | 2.05               | 1.48                            | 2.85                            | 0.00671    | DNA Damage - Repair                                   |                              |
| <i>POLE2</i>                     |                                   | -1.18            | 0.173            | -1.52                         | -0.841                        | 0.441              | 0.349                           | 0.558                           | 6.1e-05    | DNA Damage - Repair                                   |                              |
| <i>SFN</i>                       |                                   | 1.12             | 0.336            | 0.46                          | 1.78                          | 2.17               | 1.38                            | 3.43                            | 0.0323     | Cell Cycle - Apoptosis                                |                              |
| <i>SPRY4</i>                     |                                   | 1.11             | 0.327            | 0.473                         | 1.76                          | 2.16               | 1.39                            | 3.38                            | 0.0289     | JAK-STAT                                              |                              |
| <i>STMN1</i>                     |                                   | -1.45            | 0.313            | -2.06                         | -0.833                        | 0.367              | 0.24                            | 0.561                           | 0.00372    | MAPK                                                  |                              |
| <i>TMPPSS2</i>                   |                                   | -3.88            | 1.11             | -6.06                         | -1.7                          | 0.0679             | 0.0149                          | 0.309                           | 0.0248     | Transcriptional Misregulation                         |                              |
| <i>UBE2T</i>                     |                                   | -1.03            | 0.16             | -1.34                         | -0.714                        | 0.491              | 0.395                           | 0.609                           | 0.000124   | DNA Damage - Repair                                   |                              |
| <i>WNT3</i>                      |                                   | 1.69             | 0.499            | 0.714                         | 2.67                          | 3.23               | 1.64                            | 6.37                            | 0.0292     | Hedgehog, Wnt                                         |                              |
| <i>WNT7A</i>                     |                                   | 1.59             | 0.527            | 0.562                         | 2.63                          | 3.02               | 1.48                            | 6.18                            | 0.0471     | Hedgehog, Wnt                                         |                              |
| <i>ZBTB16</i>                    |                                   | -2.84            | 0.75             | -4.31                         | -1.37                         | 0.14               | 0.0505                          | 0.388                           | 0.0169     | Transcriptional Misregulation                         |                              |

MECOM was excluded from analysis due to overlap between the median and 95%CI.

BH p-value = Benjamini-Hochberg adjusted p-value

Supplemental table 6B. List of single gene RNA that significantly differ between molecular subtypes using IO360 panel in 40 early- and late-stage VSCC.

|                         | Gene    | Log2 fold change | std error (log2) | Lower confidence limit (log2) | Upper confidence limit (log2) | Linear fold change | Lower confidence limit (linear) | Upper confidence limit (linear) | BH p-value | Pathways                                                           |
|-------------------------|---------|------------------|------------------|-------------------------------|-------------------------------|--------------------|---------------------------------|---------------------------------|------------|--------------------------------------------------------------------|
| HPVpos vs HPVneg/p53w   | CDKN2A  | -2,46            | 0,565            | -3,57                         | -1,35                         | 0,182              | 0,0845                          | 0,392                           | 0,0348     | Cell Proliferation, Metabolic Stress                               |
|                         | MMP1    | 3,22             | 0,596            | 2,05                          | 4,39                          | 9,34               | 4,15                            | 21                              | 0,00365    | Matrix Remodeling and Metastasis, Myeloid Compartment              |
| HPVpos vs HPVneg/p53mut | MMP1    | -1,12            | 0,168            | -1,45                         | -0,788                        | 0,461              | 0,367                           | 0,579                           | 0,0000776  | Matrix Remodeling and Metastasis, Myeloid Compartment              |
|                         | COL4A5  | 3,01             | 0,495            | 2,04                          | 3,98                          | 8,08               | 4,13                            | 15,8                            | 0,000157   | Matrix Remodeling and Metastasis, Myeloid Compartment              |
|                         | COL4A5  | 1,46             | 0,29             | 0,895                         | 2,03                          | 2,76               | 1,86                            | 4,09                            | 0,00151    | Matrix Remodeling and Metastasis, PI3K-Akt                         |
|                         | PC      | 1,59             | 0,311            | 0,977                         | 2,2                           | 3                  | 1,97                            | 4,58                            | 0,00151    | Metabolic Stress                                                   |
|                         | COL17A1 | 2,04             | 0,423            | 1,21                          | 2,87                          | 4,11               | 2,31                            | 7,29                            | 0,0023     | Matrix Remodeling and Metastasis, Myeloid Compartment              |
|                         | MELK    | -1,04            | 0,224            | -1,48                         | -0,6                          | 0,487              | 0,359                           | 0,66                            | 0,00251    | Cell Proliferation                                                 |
|                         | SPRY4   | 1,07             | 0,243            | 0,597                         | 1,55                          | 2,1                | 1,51                            | 2,93                            | 0,00411    | Cytotoxicity                                                       |
|                         | LTBP1   | 1,07             | 0,256            | 0,565                         | 1,57                          | 2,09               | 1,48                            | 2,97                            | 0,00719    | Matrix Remodeling and Metastasis, TGF-beta Signaling               |
|                         | CDKN2A  | -1,94            | 0,468            | -2,86                         | -1,02                         | 0,261              | 0,138                           | 0,492                           | 0,00732    | Cell Proliferation, Metabolic Stress                               |
|                         | CXCL14  | 1,74             | 0,427            | 0,899                         | 2,57                          | 3,33               | 1,87                            | 5,95                            | 0,00773    | Cytokine and Chemokine Signaling                                   |
|                         | TDO2    | 1,79             | 0,445            | 0,918                         | 2,66                          | 3,46               | 1,89                            | 6,33                            | 0,00833    |                                                                    |
|                         | SLC7A5  | 1,01             | 0,259            | 0,502                         | 1,52                          | 2,01               | 1,42                            | 2,86                            | 0,0103     | Metabolic Stress                                                   |
|                         | IFI27   | 1,21             | 0,31             | 0,604                         | 1,82                          | 2,32               | 1,52                            | 3,53                            | 0,0103     | Cytotoxicity, Interferon Signaling, Lymphoid Compartment           |
|                         | FADD    | 1,36             | 0,347            | 0,676                         | 2,04                          | 2,56               | 1,6                             | 4,1                             | 0,0103     | Apoptosis                                                          |
|                         | DUSP2   | -1,11            | 0,289            | -1,68                         | -0,544                        | 0,463              | 0,313                           | 0,686                           | 0,0113     | MAPK                                                               |
|                         | BCL2    | -1,38            | 0,365            | -2,1                          | -0,663                        | 0,385              | 0,234                           | 0,632                           | 0,013      | Apoptosis, Autophagy, Hypoxia, JAK-STAT Signaling, PI3K-Akt        |
|                         | EGFR    | 1,51             | 0,404            | 0,719                         | 2,3                           | 2,85               | 1,65                            | 4,94                            | 0,0135     | Hypoxia, MAPK, Metabolic Stress, PI3K-Akt                          |
|                         | WNT10A  | 1,02             | 0,276            | 0,481                         | 1,56                          | 2,03               | 1,4                             | 2,95                            | 0,0139     | Hedgehog Signaling, Wnt Signaling                                  |
|                         | CD70    | -1,8             | 0,498            | -2,77                         | -0,821                        | 0,288              | 0,146                           | 0,566                           | 0,0171     | Costimulatory Signaling, Lymphoid Compartment, NF-kappaB Signaling |
|                         | COL5A1  | 1,08             | 0,302            | 0,489                         | 1,67                          | 2,11               | 1,4                             | 3,18                            | 0,0179     | Matrix Remodeling and Metastasis                                   |
|                         | IFI1    | 1,63             | 0,465            | 0,721                         | 2,54                          | 3,1                | 1,65                            | 5,83                            | 0,0207     | Cytotoxicity, Interferon Signaling, Lymphoid Compartment           |
|                         | GLUL    | -1,02            | 0,295            | -1,6                          | -0,441                        | 0,493              | 0,33                            | 0,737                           | 0,0229     |                                                                    |
|                         | TGFB3   | 1,15             | 0,34             | 0,487                         | 1,82                          | 2,22               | 1,4                             | 3,53                            | 0,0254     | MAPK, Matrix Remodeling and Metastasis, TGF-beta Signaling         |
|                         | CCL21   | 1,26             | 0,38             | 0,515                         | 2                             | 2,39               | 1,43                            | 4,01                            | 0,0306     | Cytokine and Chemokine Signaling                                   |
|                         | IER3    | 1,11             | 0,348            | 0,432                         | 1,8                           | 2,16               | 1,35                            | 3,47                            | 0,0376     | Myeloid Compartment                                                |
|                         | HERC6   | 1,13             | 0,358            | 0,433                         | 1,84                          | 2,2                | 1,35                            | 3,57                            | 0,039      |                                                                    |
|                         | WNT2B   | -1,46            | 0,469            | -2,38                         | -0,544                        | 0,362              | 0,192                           | 0,686                           | 0,0439     | Hedgehog Signaling, Wnt Signaling                                  |

Supplemental table 7. List of single gene RNA that significantly differ between 40 high and low infiltrated tumors using IO360 panel.

| Gene     | Lower            |           | Upper                   |                         | Lower              |                           | Upper                     |          | BH p-value | Pathways                                                                                                                        |
|----------|------------------|-----------|-------------------------|-------------------------|--------------------|---------------------------|---------------------------|----------|------------|---------------------------------------------------------------------------------------------------------------------------------|
|          | Log2 fold change | std error | confidence limit (log2) | confidence limit (log2) | Linear fold change | confidence limit (linear) | confidence limit (linear) |          |            |                                                                                                                                 |
| DKK1     | -1.83            | 0.485     | -2.78                   | -0.877                  | 0.282              | 0.146                     | 0.544                     | 0.00464  |            | Wnt Signaling                                                                                                                   |
| NDUFA4L2 | -1.24            | 0.373     | -1.97                   | -0.507                  | 0.424              | 0.256                     | 0.704                     | 0.0121   |            |                                                                                                                                 |
| EGFR     | -1.22            | 0.336     | -1.88                   | -0.564                  | 0.429              | 0.272                     | 0.677                     | 0.0062   |            | Hypoxia, MAPK, Metabolic Stress, PI3K-Akt                                                                                       |
| CDKN2B   | -1.1             | 0.416     | -1.91                   | -0.285                  | 0.467              | 0.265                     | 0.821                     | 0.00492  |            | Cell Proliferation, Metabolic Stress, TGF-beta Signaling                                                                        |
| CD2      | 1.01             | 0.325     | 0.367                   | 1.64                    | 2.01               | 1.29                      | 3.12                      | 0.0199   |            | Costimulatory Signaling, Immune Cell Adhesion and Migration, Lymphoid Compartment                                               |
| HLA-DRA  | 1.01             | 0.22      | 0.577                   | 1.44                    | 2.01               | 1.49                      | 2.71                      | 0.000893 |            | Antigen Presentation, Costimulatory Signaling, Immune Cell Adhesion and Migration, Interferon Signaling                         |
| JAK3     | 1.03             | 0.262     | 0.521                   | 1.55                    | 2.05               | 1.43                      | 2.92                      | 0.00335  |            | Cytokine and Chemokine Signaling, Cytotoxicity, JAK-STAT Signaling, PI3K-Akt                                                    |
| C10B     | 1.04             | 0.342     | 0.366                   | 1.71                    | 2.05               | 1.29                      | 3.26                      | 0.0226   |            |                                                                                                                                 |
| CD5      | 1.04             | 0.262     | 0.531                   | 1.56                    | 2.06               | 1.44                      | 2.94                      | 0.00319  |            | Lymphoid Compartment                                                                                                            |
| CD84     | 1.04             | 0.214     | 0.624                   | 1.46                    | 2.06               | 1.54                      | 2.75                      | 0.000469 |            |                                                                                                                                 |
| LTB      | 1.04             | 0.331     | 0.393                   | 1.69                    | 2.06               | 1.31                      | 3.22                      | 0.0176   |            | NF-kappaB Signaling                                                                                                             |
| CD48     | 1.05             | 0.294     | 0.474                   | 1.63                    | 2.07               | 1.39                      | 3.09                      | 0.00713  |            | Costimulatory Signaling, Lymphoid Compartment                                                                                   |
| SELL     | 1.05             | 0.344     | 0.373                   | 1.72                    | 2.07               | 1.3                       | 3.3                       | 0.022    |            | Immune Cell Adhesion and Migration                                                                                              |
| HLA-DMB  | 1.06             | 0.235     | 0.597                   | 1.52                    | 2.08               | 1.51                      | 2.87                      | 0.00106  |            | Antigen Presentation, Immune Cell Adhesion and Migration                                                                        |
| LILRB2   | 1.07             | 0.273     | 0.534                   | 1.6                     | 2.1                | 1.45                      | 3.04                      | 0.00353  |            | Costimulatory Signaling, Myeloid Compartment                                                                                    |
| CD84     | 1.08             | 0.272     | 0.545                   | 1.61                    | 2.11               | 1.46                      | 3.06                      | 0.00332  |            |                                                                                                                                 |
| IL2RA    | 1.09             | 0.283     | 0.537                   | 1.65                    | 2.13               | 1.45                      | 3.13                      | 0.004    |            | Costimulatory Signaling, Cytokine and Chemokine Signaling, JAK-STAT Signaling, PI3K-Akt                                         |
| CD45RB   | 1.1              | 0.287     | 0.535                   | 1.66                    | 2.14               | 1.45                      | 3.16                      | 0.00412  |            |                                                                                                                                 |
| P2RY13   | 1.1              | 0.26      | 0.585                   | 1.61                    | 2.14               | 1.5                       | 3.04                      | 0.00188  |            | Myeloid Compartment                                                                                                             |
| HLA-DPB1 | 1.12             | 0.224     | 0.678                   | 1.56                    | 2.17               | 1.6                       | 2.94                      | 0.000361 |            | Antigen Presentation, Costimulatory Signaling, Immune Cell Adhesion and Migration, Interferon Signaling                         |
| PDCD1LG2 | 1.13             | 0.266     | 0.606                   | 1.65                    | 2.18               | 1.52                      | 3.13                      | 0.00181  |            | Costimulatory Signaling, Immune Cell Adhesion and Migration                                                                     |
| BIRC3    | 1.15             | 0.261     | 0.638                   | 1.66                    | 2.22               | 1.56                      | 3.16                      | 0.00122  |            | Antigen Presentation, Hypoxia, Immune Cell Adhesion and Migration, Myeloid Compartment                                          |
| STAT4    | 1.15             | 0.215     | 0.725                   | 1.57                    | 2.22               | 1.65                      | 2.97                      | 0.000197 |            | Costimulatory Signaling, JAK-STAT Signaling                                                                                     |
| CCL3L1   | 1.16             | 0.305     | 0.565                   | 1.76                    | 2.24               | 1.48                      | 3.39                      | 0.00419  |            | Cytokine and Chemokine Signaling                                                                                                |
| CD80     | 1.16             | 0.242     | 0.684                   | 1.63                    | 2.23               | 1.61                      | 3.1                       | 0.000592 |            | Costimulatory Signaling, Immune Cell Adhesion and Migration, Lymphoid Compartment                                               |
| PTPRC    | 1.16             | 0.285     | 0.602                   | 1.72                    | 2.24               | 1.52                      | 3.29                      | 0.00258  |            | Costimulatory Signaling, Immune Cell Adhesion and Migration                                                                     |
| BIRC3    | 1.17             | 0.316     | 0.555                   | 1.79                    | 2.26               | 1.47                      | 3.47                      | 0.00524  |            | Apoptosis, NF-kappaB Signaling                                                                                                  |
| CD28     | 1.17             | 0.329     | 0.803                   | 1.65                    | 2.25               | 1.62                      | 3.14                      | 0.000587 |            | Antigen Presentation, Cytokine and Chemokine Signaling, Myeloid Compartment                                                     |
| CTLA4    | 1.17             | 0.265     | 0.647                   | 1.69                    | 2.25               | 1.57                      | 3.22                      | 0.00122  |            | Costimulatory Signaling, Immune Cell Adhesion and Migration, Lymphoid Compartment                                               |
| FBP1     | 1.17             | 0.405     | 0.381                   | 1.97                    | 2.26               | 1.3                       | 3.91                      | 0.0296   |            | Metabolic Stress                                                                                                                |
| HAVCR2   | 1.18             | 0.288     | 0.615                   | 1.74                    | 2.26               | 1.53                      | 3.35                      | 0.00244  |            | Costimulatory Signaling                                                                                                         |
| KLRF1    | 1.18             | 0.308     | 0.58                    | 1.79                    | 2.27               | 1.5                       | 3.45                      | 0.00405  |            | Cytotoxicity, Lymphoid Compartment                                                                                              |
| TIGIT    | 1.19             | 0.267     | 0.667                   | 1.72                    | 2.28               | 1.59                      | 3.28                      | 0.00112  |            | Costimulatory Signaling, Immune Cell Adhesion and Migration, Lymphoid Compartment                                               |
| CCL4     | 1.2              | 0.315     | 0.735                   | 1.57                    | 2.3                | 1.5                       | 3.52                      | 0.00418  |            | Antigen Presentation, Cytokine and Chemokine Signaling, Myeloid Compartment                                                     |
| HLA-DRB1 | 1.21             | 0.333     | 0.553                   | 1.86                    | 2.31               | 1.47                      | 3.63                      | 0.00649  |            | Antigen Presentation, Costimulatory Signaling, Immune Cell Adhesion and Migration, Interferon Signaling                         |
| IRF8     | 1.21             | 0.265     | 0.69                    | 1.73                    | 2.31               | 1.61                      | 3.32                      | 0.000929 |            | Antigen Presentation, Interferon Signaling                                                                                      |
| CD45RO   | 1.24             | 0.226     | 0.797                   | 1.68                    | 2.36               | 1.74                      | 3.21                      | 0.00015  |            |                                                                                                                                 |
| LILRB4   | 1.24             | 0.365     | 0.527                   | 1.96                    | 2.37               | 1.44                      | 3.89                      | 0.00996  |            |                                                                                                                                 |
| IL2RG    | 1.25             | 0.227     | 0.785                   | 1.71                    | 2.38               | 1.72                      | 3.28                      | 0.000201 |            | Costimulatory Signaling, Cytokine and Chemokine Signaling, JAK-STAT Signaling, Lymphoid Compartment, PI3K-Akt                   |
| CD5      | 1.27             | 0.25      | 0.783                   | 1.76                    | 2.41               | 1.72                      | 3.39                      | 0.000288 |            | Immune Cell Adhesion and Migration, Lymphoid Compartment                                                                        |
| GBP4     | 1.29             | 0.3       | 0.704                   | 1.88                    | 2.45               | 1.63                      | 3.68                      | 0.00155  |            | Interferon Signaling                                                                                                            |
| IL2RB    | 1.32             | 0.251     | 0.826                   | 1.81                    | 2.49               | 1.77                      | 3.51                      | 0.000206 |            | Costimulatory Signaling, Cytokine and Chemokine Signaling, JAK-STAT Signaling, PI3K-Akt                                         |
| ITGAL    | 1.35             | 0.258     | 0.841                   | 1.85                    | 2.54               | 1.79                      | 3.61                      | 0.000206 |            | Immune Cell Adhesion and Migration, Matrix Remodeling and Metastasis                                                            |
| MS4A1    | 1.36             | 0.436     | 0.502                   | 2.21                    | 2.56               | 1.42                      | 4.63                      | 0.0189   |            | Lymphoid Compartment                                                                                                            |
| FCGR1A   | 1.38             | 0.334     | 0.728                   | 2.04                    | 2.61               | 1.66                      | 4.11                      | 0.00221  |            | Antigen Presentation, Interferon Signaling, Myeloid Compartment                                                                 |
| LOK      | 1.39             | 0.266     | 0.868                   | 1.91                    | 2.62               | 1.82                      | 3.76                      | 0.000206 |            | Costimulatory Signaling, Lymphoid Compartment                                                                                   |
| CD96     | 1.42             | 0.255     | 0.922                   | 1.92                    | 2.68               | 1.9                       | 3.78                      | 0.000119 |            | Lymphoid Compartment                                                                                                            |
| CCR5     | 1.43             | 0.234     | 0.972                   | 1.89                    | 2.7                | 1.96                      | 3.71                      | 4.51e-05 |            | Antigen Presentation, Cytokine and Chemokine Signaling                                                                          |
| CD7      | 1.43             | 0.263     | 0.915                   | 1.95                    | 2.7                | 1.89                      | 3.86                      | 0.000157 |            | Lymphoid Compartment                                                                                                            |
| CD30     | 1.44             | 0.244     | 0.962                   | 1.92                    | 2.71               | 1.95                      | 3.78                      | 6.05e-05 |            | Costimulatory Signaling, Lymphoid Compartment                                                                                   |
| CD274    | 1.45             | 0.329     | 0.803                   | 2.09                    | 2.73               | 1.74                      | 4.26                      | 0.00122  |            | Costimulatory Signaling, Immune Cell Adhesion and Migration, Lymphoid Compartment                                               |
| GZMK     | 1.46             | 0.296     | 0.879                   | 2.04                    | 2.75               | 1.84                      | 4.11                      | 0.000414 |            | Cytotoxicity, Lymphoid Compartment                                                                                              |
| LYZ      | 1.46             | 0.308     | 0.859                   | 2.07                    | 2.76               | 1.81                      | 4.19                      | 0.000613 |            | Myeloid Compartment                                                                                                             |
| TNFRSF9  | 1.48             | 0.245     | 0.996                   | 1.96                    | 2.78               | 2                         | 3.88                      | 5.13e-05 |            |                                                                                                                                 |
| TRAT1    | 1.48             | 0.354     | 0.785                   | 2.17                    | 2.79               | 1.72                      | 4.51                      | 0.00201  |            | Costimulatory Signaling                                                                                                         |
| CXCL11   | 1.51             | 0.529     | 0.473                   | 2.55                    | 2.85               | 1.39                      | 5.84                      | 0.0329   |            | Cytokine and Chemokine Signaling, Lymphoid Compartment                                                                          |
| SH2D1A   | 1.52             | 0.283     | 0.962                   | 2.07                    | 2.86               | 1.95                      | 4.2                       | 0.000187 |            |                                                                                                                                 |
| ZAP70    | 1.53             | 0.257     | 1.03                    | 2.04                    | 2.89               | 2.04                      | 4.1                       | 5.7e-05  |            | Costimulatory Signaling, Lymphoid Compartment, MAPK                                                                             |
| CD3E     | 1.56             | 0.305     | 0.964                   | 2.16                    | 2.95               | 1.95                      | 4.47                      | 0.000267 |            | Costimulatory Signaling, Lymphoid Compartment                                                                                   |
| CXCL10   | 1.61             | 0.451     | 0.724                   | 2.49                    | 3.05               | 1.65                      | 5.63                      | 0.00722  |            | Cytokine and Chemokine Signaling, Lymphoid Compartment                                                                          |
| CD8B     | 1.7              | 0.265     | 1.18                    | 2.22                    | 3.25               | 2.27                      | 4.65                      | 4.06e-05 |            | Antigen Presentation, Immune Cell Adhesion and Migration, Lymphoid Compartment                                                  |
| CTSW     | 1.75             | 0.351     | 1.11                    | 2.4                     | 3.37               | 2.15                      | 5.29                      | 0.000197 |            | Antigen Presentation                                                                                                            |
| CXCL9    | 1.76             | 0.416     | 0.94                    | 2.57                    | 3.38               | 1.92                      | 5.94                      | 0.00186  |            | Cytokine and Chemokine Signaling, Lymphoid Compartment                                                                          |
| KLRF1    | 1.76             | 0.306     | 1.17                    | 2.36                    | 3.4                | 2.24                      | 5.15                      | 7.61e-05 |            | Cytotoxicity, Lymphoid Compartment                                                                                              |
| KLRD1    | 1.77             | 0.338     | 1.1                     | 2.43                    | 3.4                | 2.15                      | 5.38                      | 0.000206 |            | Antigen Presentation, Cytotoxicity, Lymphoid Compartment                                                                        |
| CXCR6    | 1.78             | 0.279     | 1.24                    | 2.33                    | 3.44               | 2.36                      | 5.03                      | 4.06e-05 |            | Cytokine and Chemokine Signaling                                                                                                |
| CXCL13   | 1.8              | 0.425     | 0.965                   | 2.63                    | 3.48               | 1.95                      | 6.2                       | 0.00183  |            | Cytokine and Chemokine Signaling, Lymphoid Compartment                                                                          |
| LAD3     | 1.81             | 0.33      | 1.16                    | 2.45                    | 3.5                | 2.23                      | 5.47                      | 0.00015  |            | Costimulatory Signaling, Lymphoid Compartment                                                                                   |
| IDO1     | 1.84             | 0.414     | 1.02                    | 2.65                    | 3.57               | 2.03                      | 6.26                      | 0.00116  |            | Lymphoid Compartment                                                                                                            |
| IFNG     | 1.84             | 0.586     | 0.689                   | 2.98                    | 3.57               | 1.61                      | 7.91                      | 0.0181   |            | Antigen Presentation, Cytotoxicity, Hypoxia, Interferon Signaling, JAK-STAT Signaling, Lymphoid Compartment, TGF-beta Signaling |
| GZMA     | 1.89             | 0.333     | 1.24                    | 2.54                    | 3.71               | 2.36                      | 5.84                      | 9.37e-05 |            | Cytotoxicity, Lymphoid Compartment                                                                                              |
| CCL5     | 1.9              | 0.272     | 1.36                    | 2.43                    | 3.73               | 2.58                      | 5.4                       | 2.57e-05 |            | Cytokine and Chemokine Signaling, Myeloid Compartment                                                                           |
| CD8A     | 1.91             | 0.301     | 1.32                    | 2.5                     | 3.77               | 2.5                       | 5.67                      | 4.06e-05 |            | Antigen Presentation, Immune Cell Adhesion and Migration, Lymphoid Compartment                                                  |
| NKG7     | 1.95             | 0.31      | 1.34                    | 2.56                    | 3.87               | 2.54                      | 5.91                      | 4.06e-05 |            |                                                                                                                                 |
| GNLY     | 1.98             | 0.32      | 1.35                    | 2.6                     | 3.93               | 2.55                      | 6.07                      | 4.16e-05 |            | Cytotoxicity, Lymphoid Compartment                                                                                              |
| GZMB     | 2.03             | 0.402     | 1.24                    | 2.81                    | 4.07               | 2.36                      | 7.03                      | 0.000316 |            | Apoptosis, Cytotoxicity, Lymphoid Compartment, Notch Signaling                                                                  |
| PRF1     | 2.03             | 0.329     | 1.39                    | 2.68                    | 4.09               | 2.61                      | 6.39                      | 4.16e-05 |            | Cytotoxicity, Lymphoid Compartment                                                                                              |
| GZMH     | 2.25             | 0.422     | 1.42                    | 3.08                    | 4.75               | 2.68                      | 8.43                      | 0.000197 |            | Cytotoxicity, Lymphoid Compartment                                                                                              |
| HLA-DQA2 | 3.1              | 0.533     | 2.06                    | 4.15                    | 8.6                | 4.17                      | 17.7                      | 7.12e-05 |            | Antigen Presentation, Costimulatory Signaling, Immune Cell Adhesion and Migration, Interferon Signaling                         |

BH p-value = Benjamini-Hochberg adjusted p-value
